# Supplementary material for: Schwann cell reprogramming and lung cancer progression: a meta-analysis of transcriptome data
Source: PubMed Central journal article supplement (PMC6944448; doi:10.18632/oncotarget.27204), 2019-12-31
Supplement: oncotarget-10-7288-s001.pdf [file oncotarget-10-7288-s001.pdf]

## Schwann cell reprogramming and lung cancer progression: a meta-analysis of transcriptome data

### SUPPLEMENTARY MATERIALS

**Supplementary Table 1: Functional annotation analysis of downregulated differentially expressed genes (DEGs) in Schwann cells datasets using the DAVID tool**

| Term                                                             | Count | P value    | Genes                                                                                                                                                                                                            | Pop Hits | Fold Enrichment | Bonferroni  |
|------------------------------------------------------------------|-------|------------|------------------------------------------------------------------------------------------------------------------------------------------------------------------------------------------------------------------|----------|-----------------|-------------|
| hsa05200:Pathways in cancer                                      | 31    | 6,88E-04   | WNT5A, FGFR1, FGF18, FGF7, WNT5B, PGF, FGF11, BCL2L1, TGFB1, TCF7L1, CTNNB1, IGF1R, BCL2, HHIP, WNT8B, FN1, EGFR, TGFBR1, CBL, RUNX1T1, LEF1, BIRC5, FZD5, STK4, CDK2, PRKCB, PLCG2, PDGFRA, JAK1, WNT9A, ITGA2B | 328      | 1,899583052     | 0,096222132 |
| hsa04510:Focal adhesion                                          | 22    | 8,54E-04   | EGFR, FLT1, PGF, COL3A1, ITGB4, ITGA11, ITGB5, ACTN2, CTNNB1, PRKCB, IGF1R, CCND3, CCND2, RASGRF1, COMP, BCL2, COL6A3, PDGFRA, RELN, COL1A1, FN1, ITGA2B                                                         | 201      | 2,199870214     | 0,118016284 |
| hsa05412: Arrhythmogenic right ventricular cardiomyopathy (ARVC) | 11    | 0,0039537  | SLC8A1, SGCG, ITGB4, ITGA11, LEF1, ITGB5, ACTN2, CACNA1C, TCF7L1, ITGA2B, CTNNB1                                                                                                                                 | 76       | 2,909038902     | 0,441413264 |
| hsa04520:Adherens junction                                       | 11    | 0,00435076 | EGFR, IGF1R, FGFR1, TGFBR1, LMO7, LEF1, ACTN2, INSR, TCF7L1, FARP2, CTNNB1                                                                                                                                       | 77       | 2,871259176     | 0,473211952 |
| hsa05217:Basal cell carcinoma                                    | 9     | 0,00522849 | WNT5A, WNT5B, LEF1, WNT9A, HHIP, FZD5, TCF7L1, CTNNB1, WNT8B                                                                                                                                                     | 55       | 3,288896874     | 0,537266618 |
| hsa04115:p53 signaling pathway                                   | 10    | 0,00591844 | CCNB2, CCND3, CCND2, RRM2, ATR, GADD45B, IGFBP3, GTSE1, CDK2, TP53AIP1                                                                                                                                           | 68       | 2,955707975     | 0,582134333 |
| hsa05210:Colorectal cancer                                       | 11    | 0,00808527 | EGFR, IGF1R, BCL2, TGFBR1, PDGFRA, LEF1, BIRC5, FZD5, TCF7L1, TGFB1, CTNNB1                                                                                                                                      | 84       | 2,631987578     | 0,696801067 |
| hsa04914:Progesterone-mediated oocyte maturation                 | 11    | 0,00950996 | PGR, IGF1R, ADCY4, RPS6KA6, CCNB2, ANAPC5, ADCY8, BUB1, PDE3A, CDC25C, CDK2                                                                                                                                      | 86       | 2,570778564     | 0,754548123 |

(Continued)

| Term                                          | Count | P value    | Genes                                                                                                               | Pop Hits | Fold Enrichment | Bonferroni  |
|-----------------------------------------------|-------|------------|---------------------------------------------------------------------------------------------------------------------|----------|-----------------|-------------|
| hsa04114:Oocyte meiosis                       | 12    | 0,01958301 | PGR, IGF1R, ADCY4, RPS6KA6, CCNB2, ANAPC5, ADCY8, BUB1, FBXO5, PTTG2, CDC25C, CDK2                                  | 110      | 2,192597916     | 0,945374938 |
| hsa04340:Hedgehog signaling pathway           | 8     | 0,01961551 | WNT5A, WNT5B, WNT9A, HHIP, LRP2, BMP7, IHH, WNT8B                                                                   | 56       | 2,871259176     | 0,945640478 |
| hsa04512:ECM-receptor interaction             | 10    | 0,02228893 | COMP, COL6A3, COL3A1, ITGB4, ITGA11, ITGB5, RELN, COL1A1, ITGA2B, FN1                                               | 84       | 2,39271598      | 0,963612841 |
| hsa04916: Melanogenesis                       | 11    | 0,02390153 | WNT5A, ADCY4, WNT5B, ADCY8, LEF1, WNT9A, FZD5, TCF7L1, PRKCB, CTNNB1, WNT8B                                         | 99       | 2,233201581     | 0,971452794 |
| hsa04020:Calcium signaling pathway            | 16    | 0,0271791  | EGFR, PTGER1, ADCY4, SLC8A1, NOS1, ADCY8, CACNA1I, PTGFR, PRKCB, EDNRA, AGTR1, ATP2A3, RYR3, PLCG2, PDGFRA, CACNA1C | 176      | 1,82716493      | 0,982588545 |
| hsa05414:Dilated cardiomyopathy               | 10    | 0,03744429 | ADCY4, SLC8A1, SGCG, ADCY8, ITGB4, ITGA11, ITGB5, CACNA1C, TGFB1, ITGA2B                                            | 92       | 2,184653721     | 0,996338966 |
| hsa04110:Cell cycle                           | 12    | 0,04460437 | CDC45, CCNB2, CCND3, ANAPC5, CCND2, BUB1, PTTG2, ATR, CDC25C, GADD45B, CDK2, TGFB1                                  | 125      | 1,929486166     | 0,998778376 |
| hsa05014: Amyotrophic lateral sclerosis (ALS) | 7     | 0,04558666 | ALS2, SLC1A2, NOS1, GRIA2, BCL2, RAB5A, BCL2L1                                                                      | 53       | 2,65456037      | 0,998949816 |

The results revealed that downregulated consistent DEGs indicated the genes that were mainly associated with “Pathways in cancer” and, “Focal adhesion”.

**Supplementary Table 2: Functional annotation analysis of upregulated differentially expressed genes (DEGs) in Schwann cells datasets using the DAVID tool**

| Term                                             | Count | P value    | Genes                                                                                                                                                                | Pop Hits | Fold Enrichment |
|--------------------------------------------------|-------|------------|----------------------------------------------------------------------------------------------------------------------------------------------------------------------|----------|-----------------|
| hsa04080:Neuroactive ligand-receptor interaction | 24    | 1,95E-06   | CSH1, MCHR1, F2RL3, GABRG3, PTH2R, GRIK1, GABRA4, GABRB2, GLRA3, GABRA5, BRS3, FPR3, GRM1, TAAR8, GH2, GH1, SSTR5, APLNR, P2RY10, CHRM3, GRIA2, CHRM1, ADRA1A, GPR50 | 256      | 3,075604839     |
| hsa04950:Maturity onset diabetes of the young    | 4     | 0,03846734 | HES1, HHEX, HNF1A, FOXA2                                                                                                                                             | 25       | 5,249032258     |
| hsa00350:Tyrosine metabolism                     | 5     | 0,04300193 | DDC, PNMT, ADH1B, DBH, FAH                                                                                                                                           | 44       | 3,728005865     |

The results revealed that upregulated consistent DEGs indicated the genes that were associated with “Neuroactive ligand-receptor interaction”, “Maturity onset diabetes of the young” and, “Tyrosine metabolism”.

**Supplementary Table 3: Functional annotation analysis of downregulated differentially expressed (DEGs) overlapped genes in Schwann cells and lung adenocarcinoma datasets using the DAVID tool**

| Term                                             | Count | P value    | Genes                                                                                                                                                                | Pop Hits | Fold Enrichment |
|--------------------------------------------------|-------|------------|----------------------------------------------------------------------------------------------------------------------------------------------------------------------|----------|-----------------|
| hsa04080:Neuroactive ligand-receptor interaction | 24    | 1,95E-06   | CSH1, MCHR1, F2RL3, GABRG3, PTH2R, GRIK1, GABRA4, GABRB2, GLRA3, GABRA5, BRS3, FPR3, GRM1, TAAR8, GH2, GH1, SSTR5, APLNR, P2RY10, CHRM3, GRIA2, CHRM1, ADRA1A, GPR50 | 256      | 3,07560484      |
| hsa04950:Maturity onset diabetes of the young    | 4     | 0,03846734 | HES1, HHEX, HNF1A, FOXA2                                                                                                                                             | 25       | 5,24903226      |
| hsa00350:Tyrosine metabolism                     | 5     | 0,04300193 | DDC, PNMT, ADH1B, DBH, FAH                                                                                                                                           | 44       | 3,72800587      |
| hsa00740:Riboflavin metabolism                   | 3     | 0,08287513 | ACP5, MTMR7, ACP                                                                                                                                                     | 16       | 6,15120968      |
| hsa04020:Calcium signaling pathway               | 10    | 0,08489932 | ATP2B2, PLCB4, CHRM3, CHRM1, ADRA1A, GNAS, CACNA1E, CAMK2B, CACNA1C, GRM1                                                                                            | 176      | 1,86400293      |

The results revealed that downregulated consistent DEGs indicated the genes that were associated with “Neuroactive ligand-receptor interaction”, “Maturity onset diabetes of the young” and, “Tyrosine metabolism”.

**Supplementary Table 4: Functional annotation analysis of upregulated differentially expressed (DEGs) overlapped genes in Schwann cells and lung adenocarcinoma datasets using the DAVID tool**

| Term                           | Count | P value    | Genes               | Pop Hits | Fold Enrichment |
|--------------------------------|-------|------------|---------------------|----------|-----------------|
| hsa04115:p53 signaling pathway | 3     | 0,02105574 | CCNE1, CDKN2A, PERP | 68       | 12,4632353      |
| hsa00340:Histidine metabolism  | 2     | 0,09279159 | DDC, ACY3           | 29       | 19,4827586      |

No pathways were associated with upregulated DEGs.

**Supplementary Table 5: Functional annotation analysis of downregulated differentially expressed (DEGs) overlapped genes in Schwann cells and Lung squamous cell carcinoma datasets using the DAVID tool**

| Term                                        | Count | P value    | Genes                         | Pop Hits | Fold Enrichment |
|---------------------------------------------|-------|------------|-------------------------------|----------|-----------------|
| hsa04270:Vascular smooth muscle contraction | 4     | 0,05024756 | AGTR1, ADCY4, MYH11, PPP1R14A | 112      | 4,65659341      |
| hsa04340:Hedgehog signaling pathway         | 3     | 0,06506959 | WNT9A, HHIP, IHH              | 56       | 6,98489011      |

No pathways were associated with upregulated DEGs.

**Supplementary Table 6: Functional annotation analysis of upregulated differentially expressed (DEGs) overlapped genes in Schwann cells and Lung squamous cell carcinoma datasets using the DAVID tool**

| Term                                             | Count | P value    | Genes                             | Pop Hits | Fold Enrichment |
|--------------------------------------------------|-------|------------|-----------------------------------|----------|-----------------|
| hsa04080:Neuroactive ligand-receptor interaction | 5     | 0,02607792 | PTH2R, CHRM3, GABRA5, GPR50, GRM1 | 256      | 4,13818359      |
| hsa04115:p53 signaling pathway                   | 3     | 0,03721193 | CCNE1, CDKN2A, PERP               | 68       | 9,34742647      |

The results revealed that upregulated consistent DEGs indicated the genes that were associated with “Neuroactive ligand-receptor interaction” and, “p53 signaling pathway”.

**Supplementary Table 7: Functional annotation analysis of downregulated miRNA target genes combined with upregulated genes in lung adenocarcinoma datasets using the DAVID tool**

| Term                            | Count | P value    | Genes                                                             | Pop Hits | Fold Enrichment |
|---------------------------------|-------|------------|-------------------------------------------------------------------|----------|-----------------|
| hsa04360:Axon guidance          | 8     | 8,85E-04   | SEMA5A, DCC, SEMA6A, SEMA6D, CFL2, ROBO2, CXCL12, SLIT2           | 129      | 5,0055371       |
| hsa04010:MAPK signaling pathway | 10    | 0,00463642 | DUSP1, FGF14, JUN, PTPN5, MRAS, NTRK2, TGFB2, RRAS, CACNB4, DUSP8 | 267      | 3,02300696      |
| hsa04520:Adherens junction      | 4     | 0,06686838 | PTPRM, WASF3, TGFB2, LMO7                                         | 77       | 4,19294991      |

The results revealed that downregulated target genes indicated the genes that were associated with “Axon guidance” and, “MAPK signaling pathway”.

**Supplementary Table 8: Functional annotation analysis of upregulated miRNA target genes combined with downregulated genes in lung adenocarcinoma datasets using the DAVID tool**

| Term                                             | Count | P value    | Genes                                                          | Pop Hits | Fold Enrichment |
|--------------------------------------------------|-------|------------|----------------------------------------------------------------|----------|-----------------|
| hsa04080:Neuroactive ligand-receptor interaction | 9     | 0,00512739 | GPR83, CALCR, MCHR1, GABRR1, SSTR3, PRLR, PTH2R, GRIK3, GRIN2A | 256      | 3,25035511      |
| hsa05200:Pathways in cancer                      | 9     | 0,0211608  | E2F1, E2F2, CKS1B, RET, HSP90B1, SLC2A1, SKP2, FGF11, WNT8B    | 328      | 2,53686253      |
| hsa05222:Small cell lung cancer                  | 4     | 0,05907025 | E2F1, E2F2, CKS1B, SKP2                                        | 84       | 4,4025974       |

The results revealed that upregulated target genes indicated the genes that were associated with “Neuroactive ligand-receptor interaction” and, “Pathways in cancer”.

**Supplementary Table 9: Functional annotation analysis of downregulated miRNA target genes combined with upregulated genes in Lung squamous cell carcinoma datasets using the DAVID tool**

| Term                                                            | Count | P value    | Genes                                                                                                                                               | Pop Hits | Fold Enrichment |
|-----------------------------------------------------------------|-------|------------|-----------------------------------------------------------------------------------------------------------------------------------------------------|----------|-----------------|
| hsa05414:Dilated cardiomyopathy                                 | 12    | 0,00134872 | ITGA9, ADRB1, ADCY9, ITGA1, RYR2, SGCD, CACNB4, TTN, CACNA1C, CACNA1D, CACNA2D2, TGFB2                                                              | 92       | 3,12858901      |
| hsa04270:Vascular smooth muscle contraction                     | 13    | 0,00215565 | ADORA2A, PRKG1, PRKCE, ITPR1, PRKCB, PRKCQ, GNAQ, ADCY9, GUCY1A2, CALCRL, CACNA1C, PLCB2, CACNA1D                                                   | 112      | 2,78407177      |
| hsa05410:Hypertrophic cardiomyopathy (HCM)                      | 11    | 0,00250592 | ITGA9, IL6, ITGA1, RYR2, SGCD, CACNB4, TTN, CACNA1C, CACNA1D, CACNA2D2, TGFB2                                                                       | 85       | 3,10405105      |
| hsa04020:Calcium signaling pathway                              | 16    | 0,00599574 | GNA14, ERBB4, BST1, ADORA2A, ITPR1, PRKCB, EDNRB, PLCE1, ADRB2, ADRB1, GNAQ, ADCY9, RYR2, CACNA1C, PLCB2, CACNA1D                                   | 176      | 2,18053173      |
| hsa04530:Tight junction                                         | 13    | 0,00924044 | PARD6B, CLDN18, MAGI3, MAGI1, MPDZ, PRKCE, PRKCB, EPB41L2, PRKCQ, EPB41L3, TJP1, JAM2, MYH10                                                        | 134      | 2,32698536      |
| hsa04540:Gap junction                                           | 10    | 0,01095339 | TJP1, ADRB1, GNAQ, ADCY9, GUCY1A2, PRKG2, PRKG1, PLCB2, ITPR1, PRKCB                                                                                | 89       | 2,69503922      |
| hsa04060:Cytokine-cytokine receptor interaction                 | 20    | 0,01177253 | IL18R1, IL6, BMP2, CXCL5, IL6ST, FLT4, LEPR, CSF1, TGFB2, BMP2, LIFR, IL6R, HGF, CXCL12, TGFB2, KDR, CCL13, TNFRSF10D, PLEKHO2, CSF2RA              | 262      | 1,83098084      |
| hsa04010:MAPK signaling pathway                                 | 20    | 0,01419803 | MEF2C, FGF7, FGF14, TGFB2, CACNB4, CACNA2D2, TGFB2, PRKCB, FOS, BDNF, DUSP1, RASGRP3, RPS6KA2, JUN, MAP3K8, CACNA1C, NFATC2, RAPGEF2, CACNA1D, FGF2 | 267      | 1,79669281      |
| hsa04360:Axon guidance                                          | 12    | 0,01751762 | SEMA5A, PLXNC1, NRP1, SEMA3G, ABLIM3, CFL2, SEMA3E, ROBO2, UNC5C, NFATC2, CXCL12, SLIT2                                                             | 129      | 2,23124177      |
| hsa04514:Cell adhesion molecules (CAMs)                         | 12    | 0,02046188 | NCAM2, ITGA9, CLDN18, PTPRM, CADM1, CD34, HLA-DPA1, JAM2, SDC4, NEGR1, HLA-DQA2, HLA-DQA1                                                           | 132      | 2,18053173      |
| hsa04730:Long-term depression                                   | 8     | 0,02335132 | GNAQ, GRIA1, GUCY1A2, PRKG2, PRKG1, PLCB2, ITPR1, PRKCB                                                                                             | 69       | 2,78096801      |
| hsa04640:Hematopoietic cell lineage                             | 9     | 0,02540041 | CD55, IL6, CD34, CSF1, FCGR1A, ITGA1, IL6R, CSF2RA, CD1E                                                                                            | 86       | 2,51014699      |
| hsa04630:Jak-STAT signaling pathway                             | 13    | 0,02663018 | PIK3CG, SPRY1, IL6, SOCS2, SOCS3, IL6ST, STAT5A, LEPR, LIFR, IL6R, CSF2RA, SPRY4, CISH                                                              | 155      | 2,01171637      |
| hsa05200:Pathways in cancer                                     | 22    | 0,02976063 | PIK3CG, IL6, BMP2, FGF7, FGF14, STAT5A, MITE, TGFB2, RUNX1T1, HGF, FZD5, FZD4, TGFB2, DAPK1, PRKCB, FOS, ETS1, JUN, RARA, AXIN2, FGF2, CSF2RA       | 328      | 1,60880695      |
| hsa05412:Arrhythmogenic right ventricular cardiomyopathy (ARVC) | 8     | 0,03717375 | ITGA9, ITGA1, RYR2, SGCD, CACNB4, CACNA1C, CACNA1D, CACNA2D2                                                                                        | 76       | 2,52482622      |
| hsa04930:Type II diabetes mellitus                              | 6     | 0,04376766 | PIK3CG, SOCS2, SOCS3, CACNA1C, PRKCE, CACNA1D                                                                                                       | 47       | 3,06202328      |
| hsa04912:GnRH signaling pathway                                 | 9     | 0,04959421 | GNAQ, ADCY9, JUN, HBEGF, CACNA1C, PLCB2, CACNA1D, ITPR1, PRKCB                                                                                      | 98       | 2,20278206      |

The results revealed that downregulated target genes indicated the genes that were associated with “Dilated cardiomyopathy” and, “Vascular smooth muscle contraction”.

**Supplementary Table 10: Functional annotation analysis of upregulated miRNA target genes combined with downregulated genes in Lung squamous cell carcinoma datasets using the DAVID tool**

| Term                               | Count | P value    | Genes                                                                    | Pop Hits | Fold Enrichment |
|------------------------------------|-------|------------|--------------------------------------------------------------------------|----------|-----------------|
| hsa00030:Pentose phosphate pathway | 5     | 8,37E-04   | PGM2, GPI, G6PD, PGD, PRPS2                                              | 25       | 11,3            |
| hsa04110:Cell cycle                | 7     | 0,02160488 | E2F2, YWHAZ, YWHAQ, SKP2, CDK6, MCM4, CDK2                               | 125      | 3,164           |
| hsa05200:Pathways in cancer        | 12    | 0,02689791 | EGFR, BID, WNT5A, E2F2, CKS1B, WNT7B, SKP2, FGF11, TFG, LEF1, CDK6, CDK2 | 328      | 2,06707317      |
| hsa04310:Wnt signaling pathway     | 7     | 0,04798391 | WNT5A, TBL1XR1, WNT7B, DKK1, SFRP1, SFRP2, LEF1                          | 151      | 2,6192053       |
| hsa05222:Small cell lung cancer    | 5     | 0,05876079 | E2F2, CKS1B, SKP2, CDK6, CDK2                                            | 84       | 3,36309524      |

The results revealed that upregulated target genes indicated the genes that were associated with “Pentose phosphate pathway”, “Cell cycle”, “Pathways in cancer”, and “Wnt signaling pathway”.

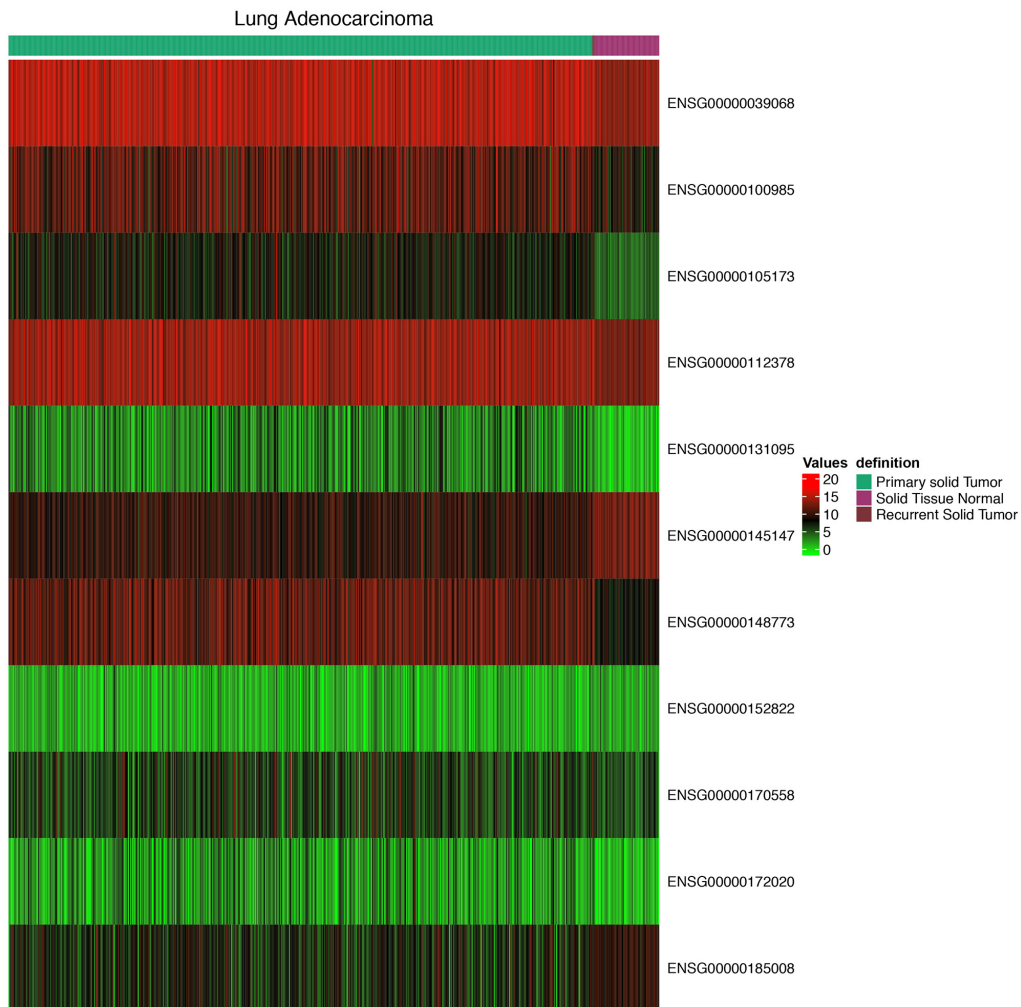

**Supplementary Figure 1: Heatmap of *Cdh1*, *Mmp9*, *Ccne1*, *Perp*, *Gfap*, *Slit2*, *Mki67*, *Grm1*, *Cdh2*, *Gap43* and, *Robo2* differentiated expressed genes (DEGs) in LUSC samples.**

### Lung Squamous Cell Carcinoma

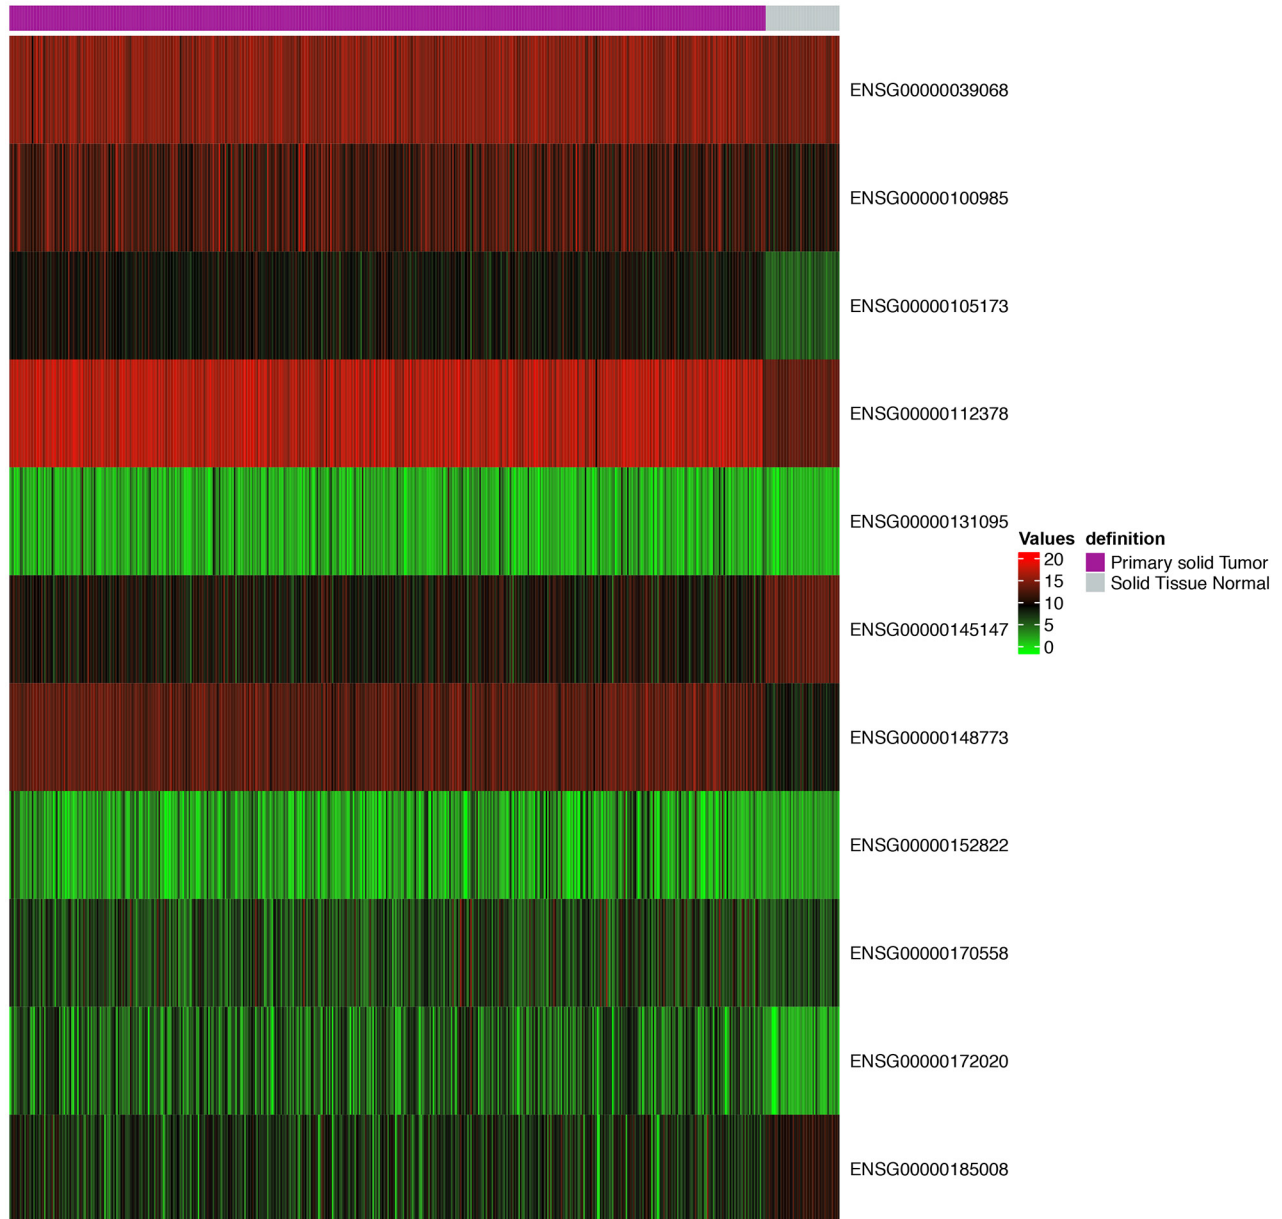

Supplementary Figure 2: Heatmap of *Cdh1*, *Mmp9*, *Ccne1*, *Perp*, *Gfap*, *Slit2*, *Mki67*, *Grm1*, *Cdh2*, *Gap43* and, *Robo2* differentiated expressed genes (DEGs) in in LUAD samples.

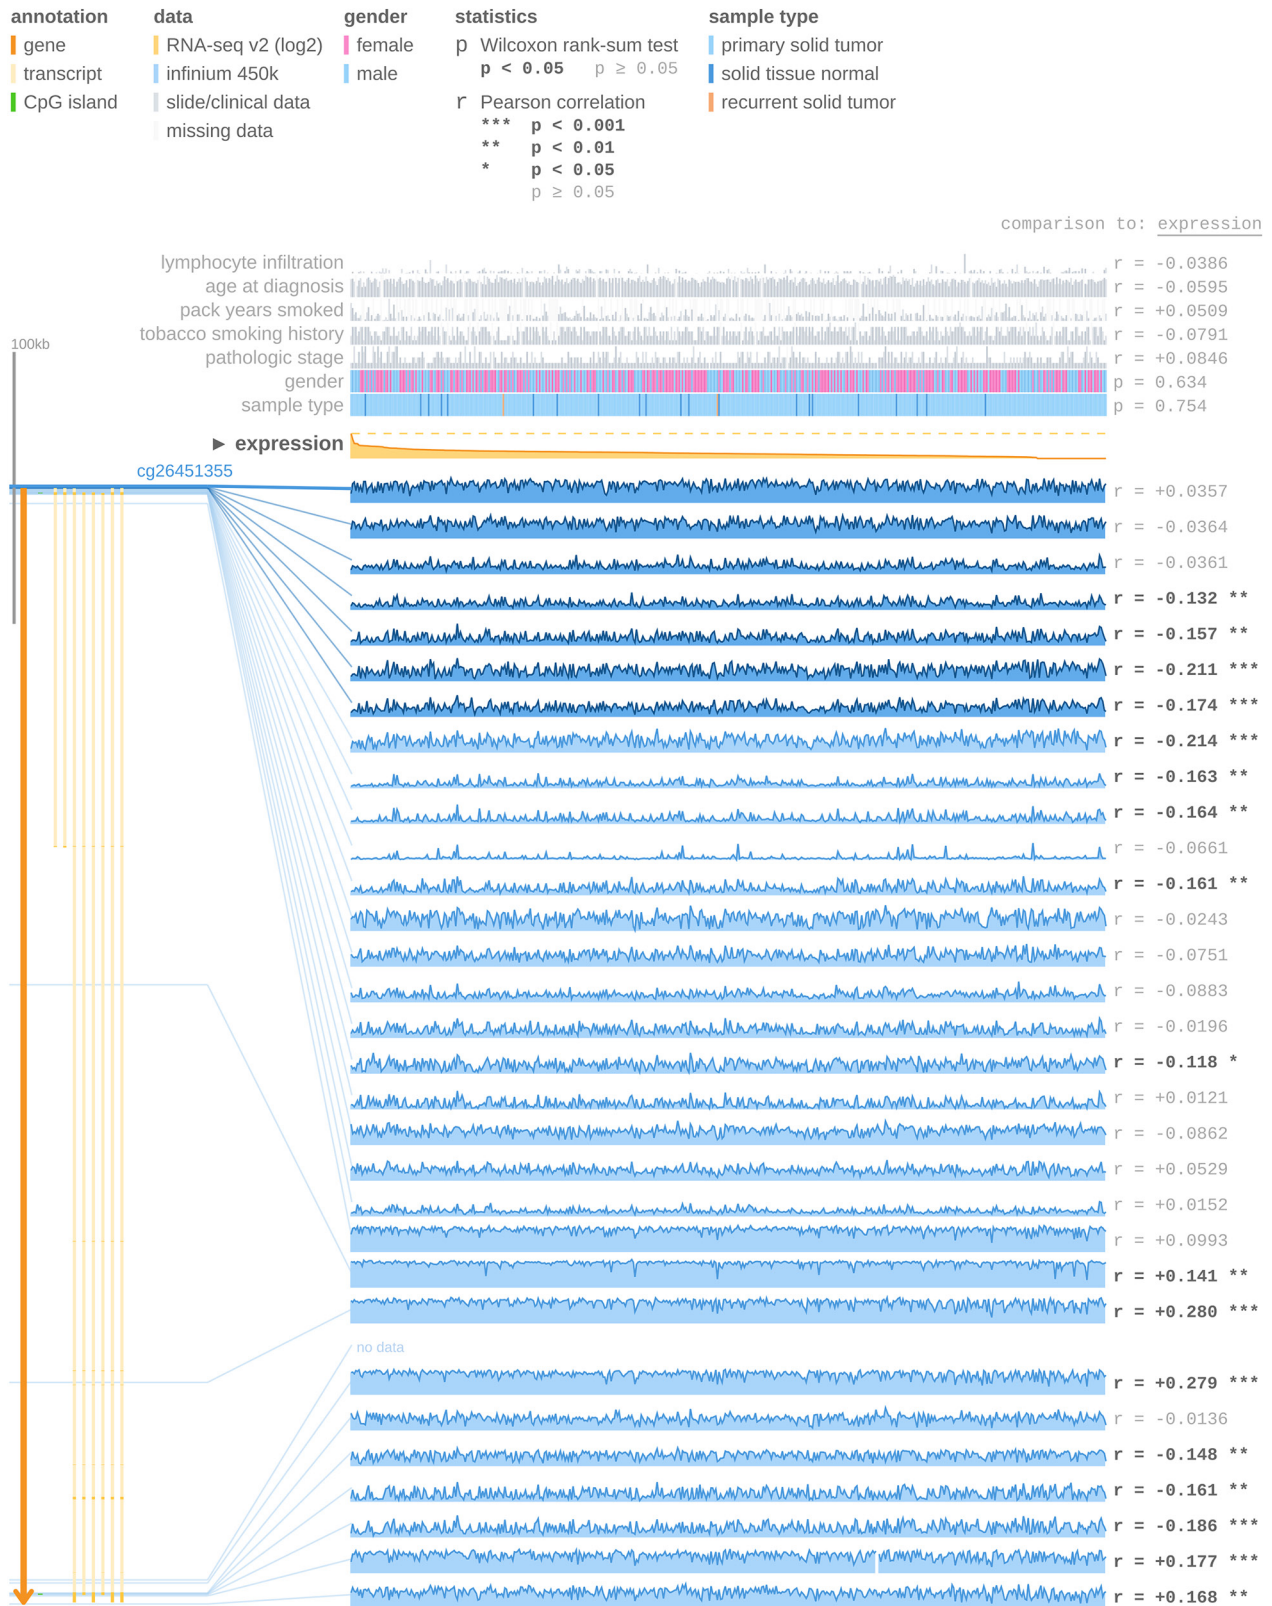

**Supplementary Figure 3: Methylation analysis of *Grm1* gene in lung adenocarcinoma. The highlighted probes are promoter gene region.**



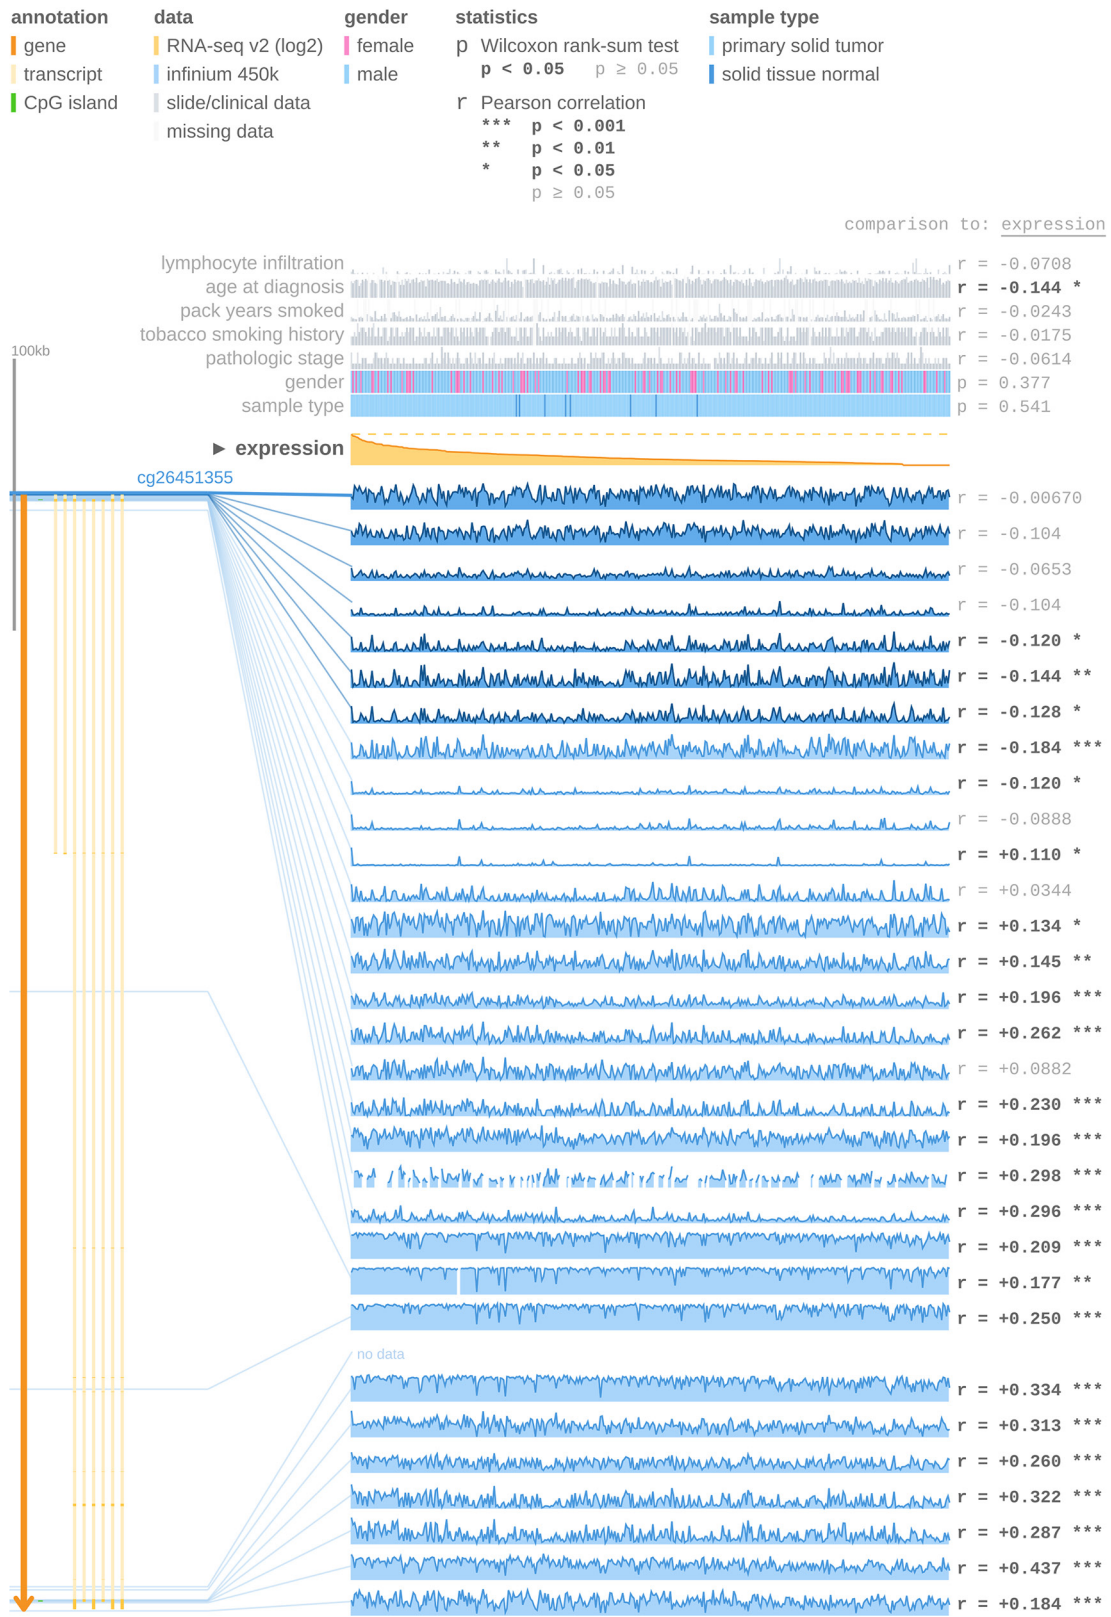

**Supplementary Figure 4: Methylation analysis of *Grm1* gene in Lung squamous cell carcinoma.** The highlighted probes are promoter gene region.

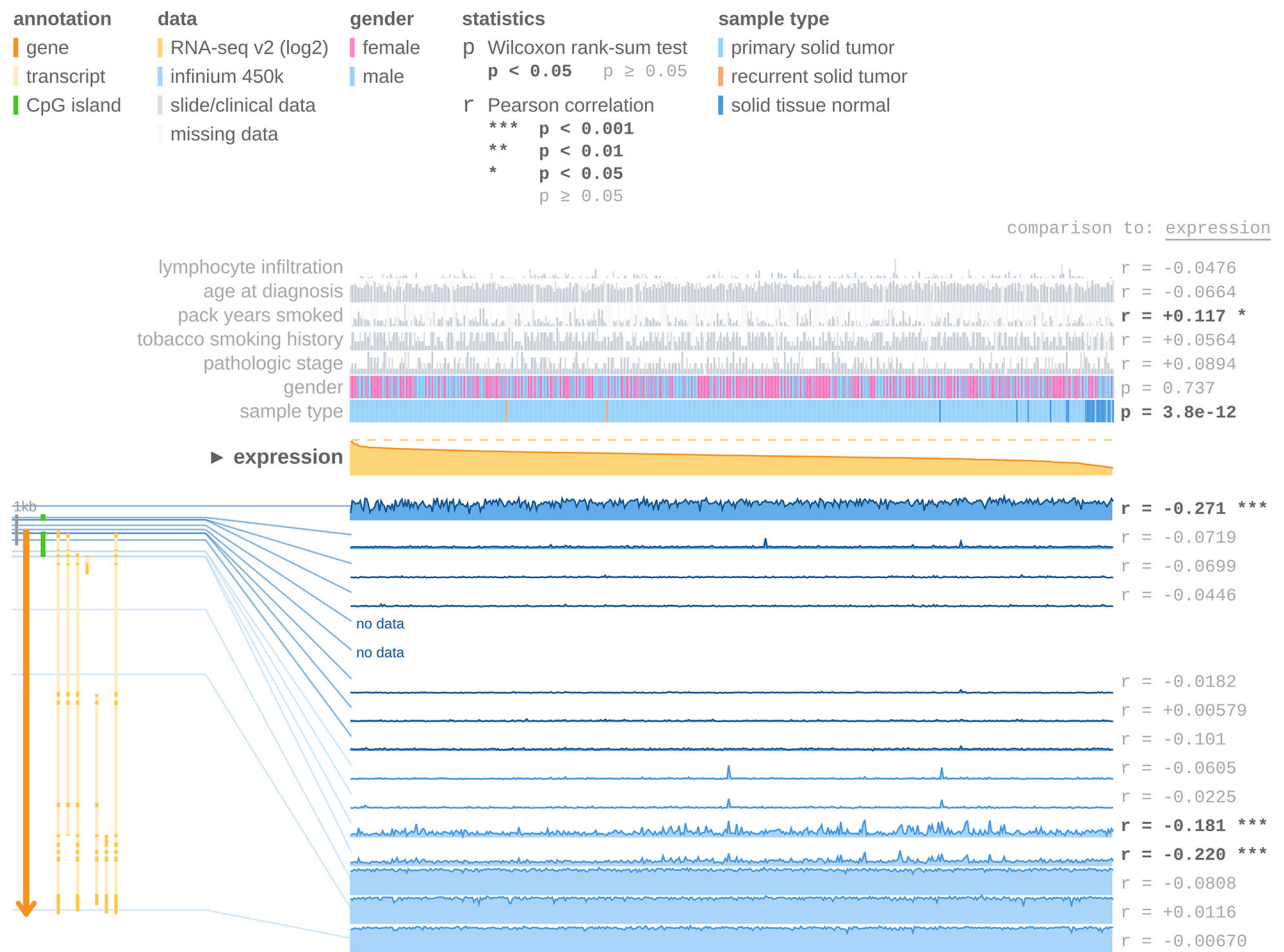

**Supplementary Figure 5: Methylation analysis of *Ccne1* gene in lung adenocarcinoma.** The highlighted probes are promoter gene region.

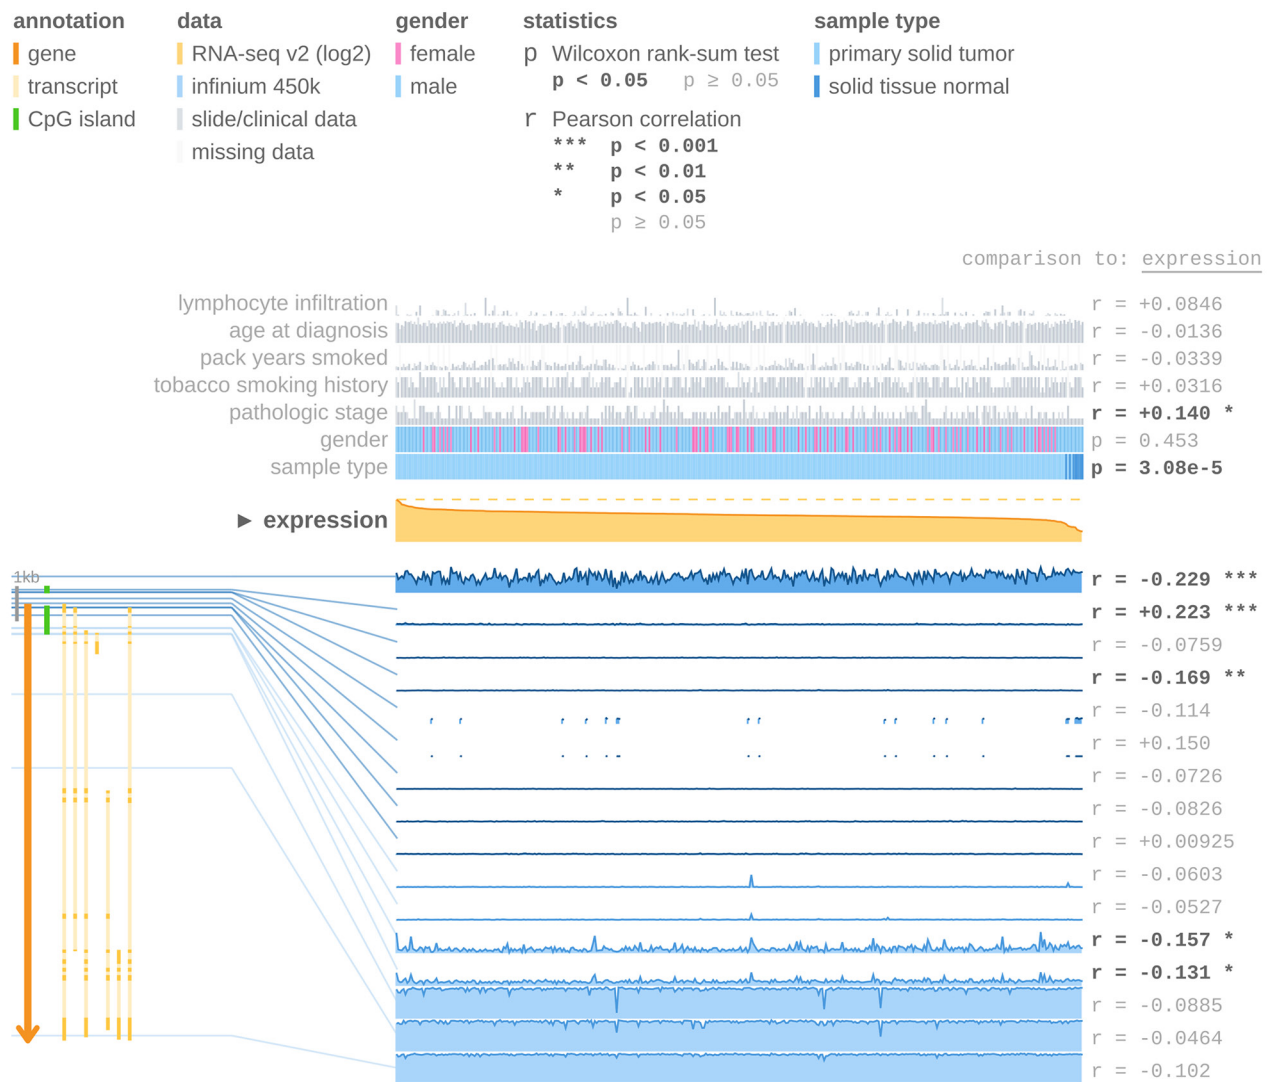

**Supplementary Figure 6: Methylation analysis of *Ccne1* gene in Lung squamous cell carcinoma.** The highlighted probes are promoter gene region.

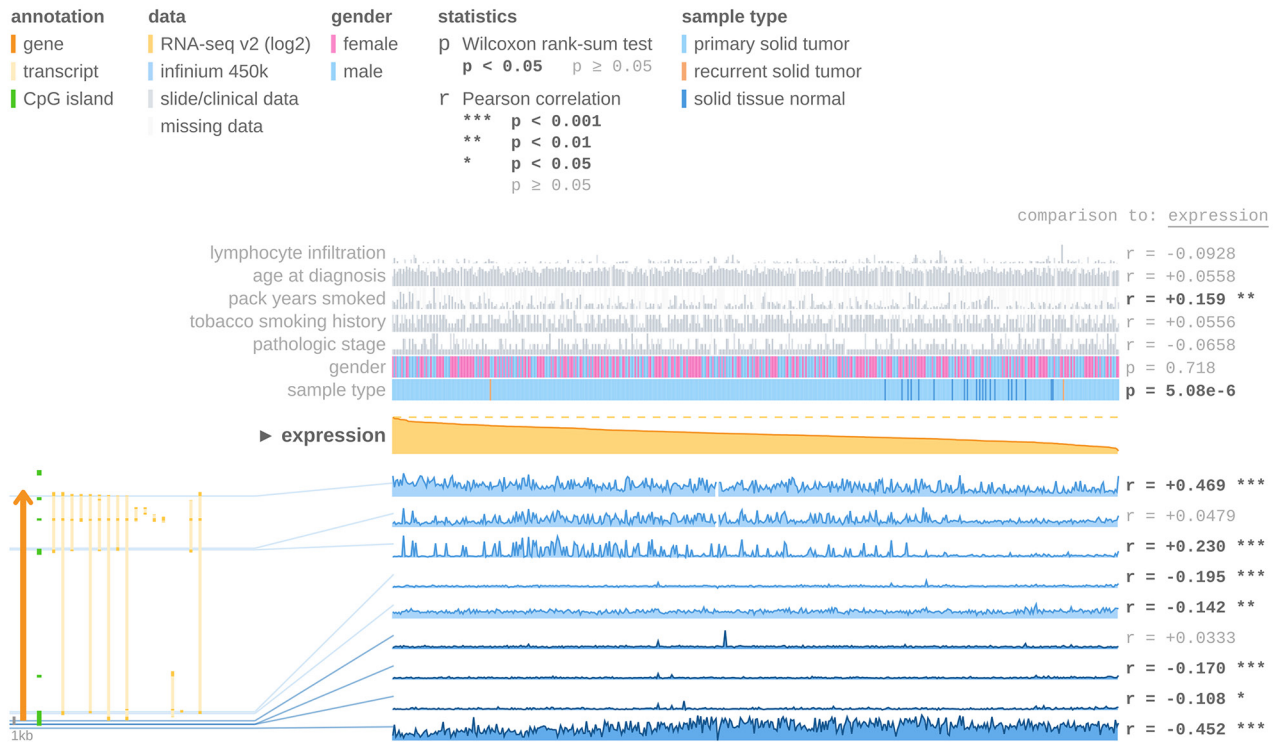

**Supplementary Figure 7: Methylation analysis of *Cdkn2a* gene in lung adenocarcinoma.** The highlighted probes are promoter gene region.

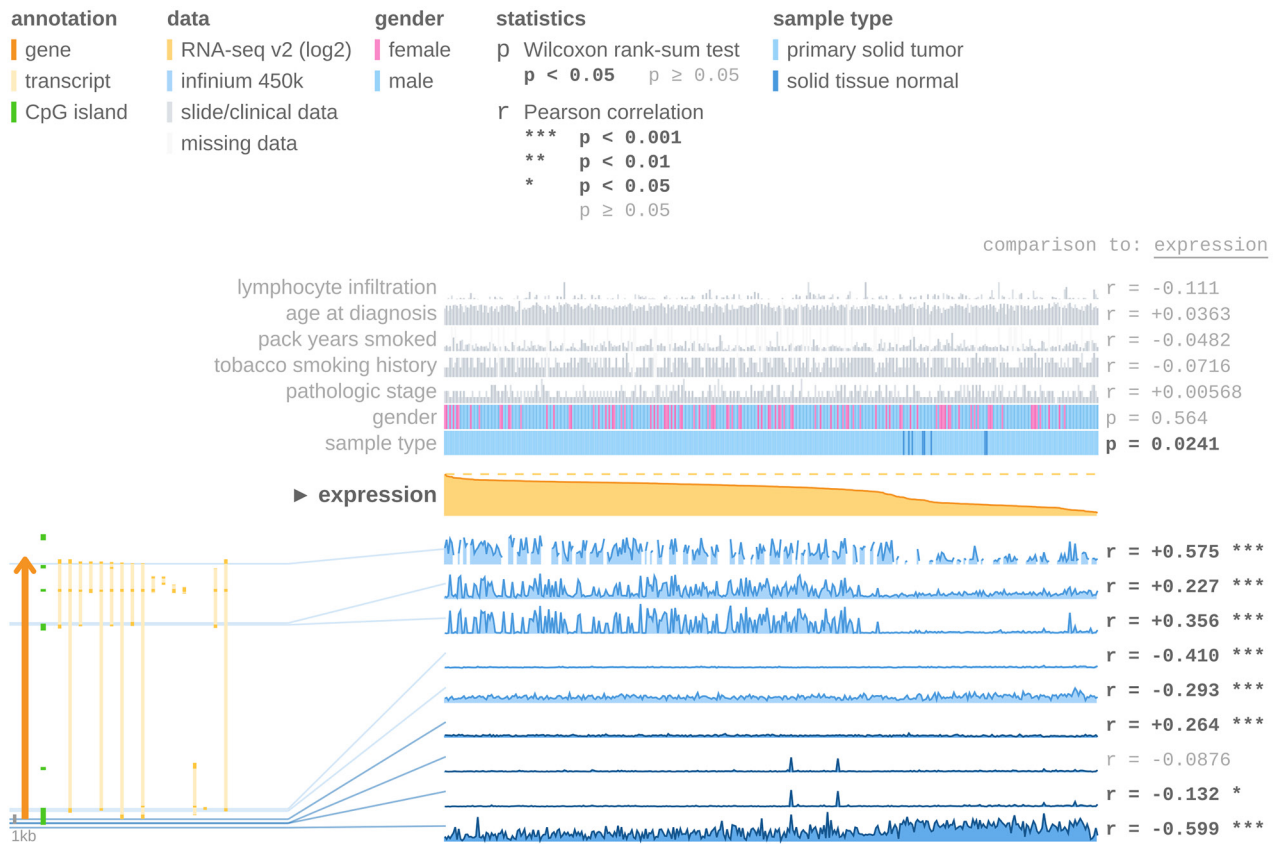

**Supplementary Figure 8: Methylation analysis of *Cdkn2a* gene in Lung squamous cell carcinoma.** The highlighted probes are promoter gene region.

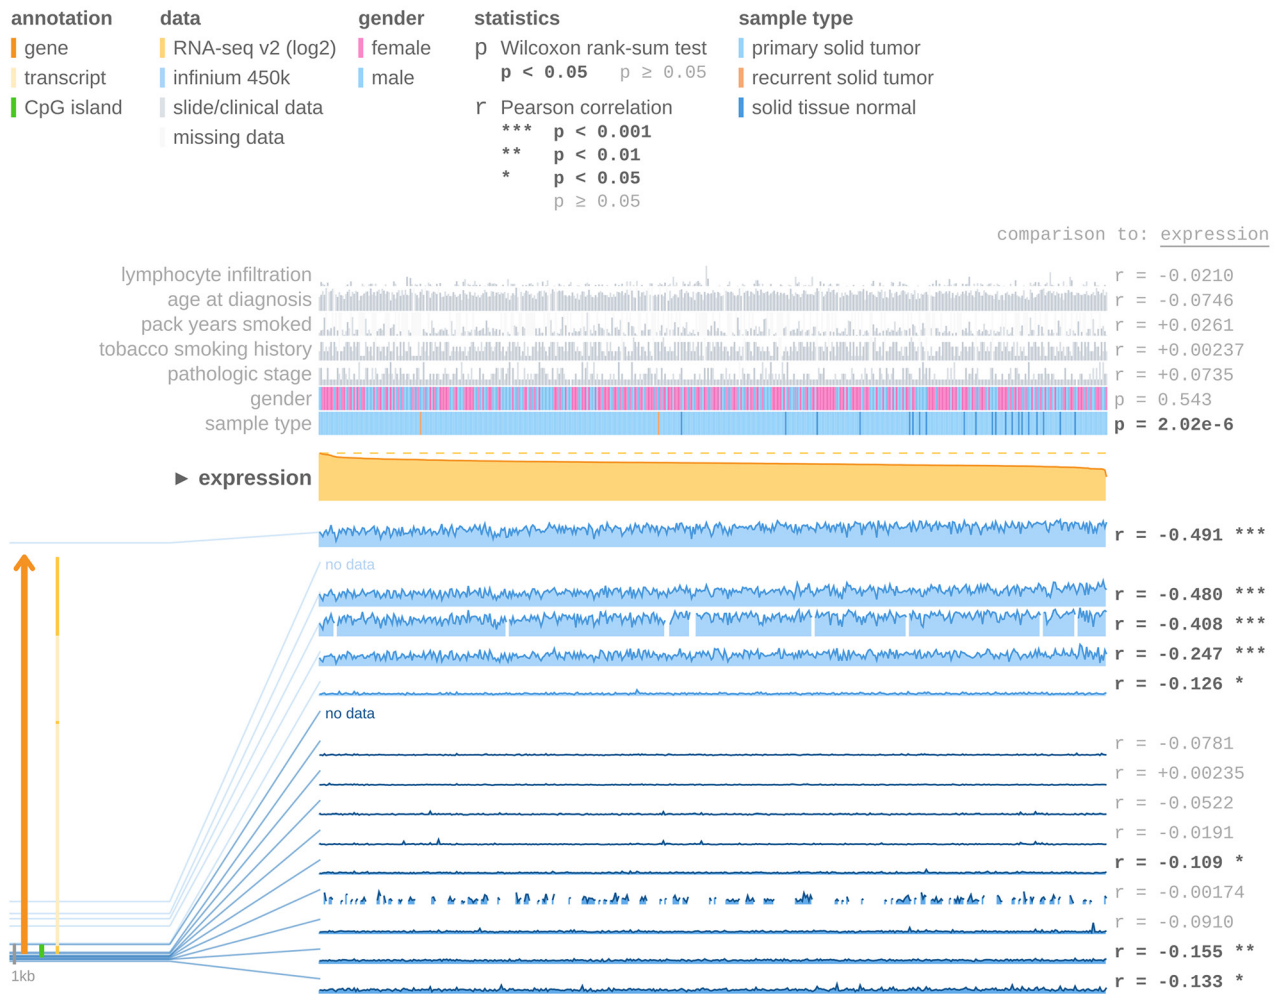

**Supplementary Figure 9: Methylation analysis of *Perp* gene in lung adenocarcinoma. The highlighted probes are promoter gene region.**

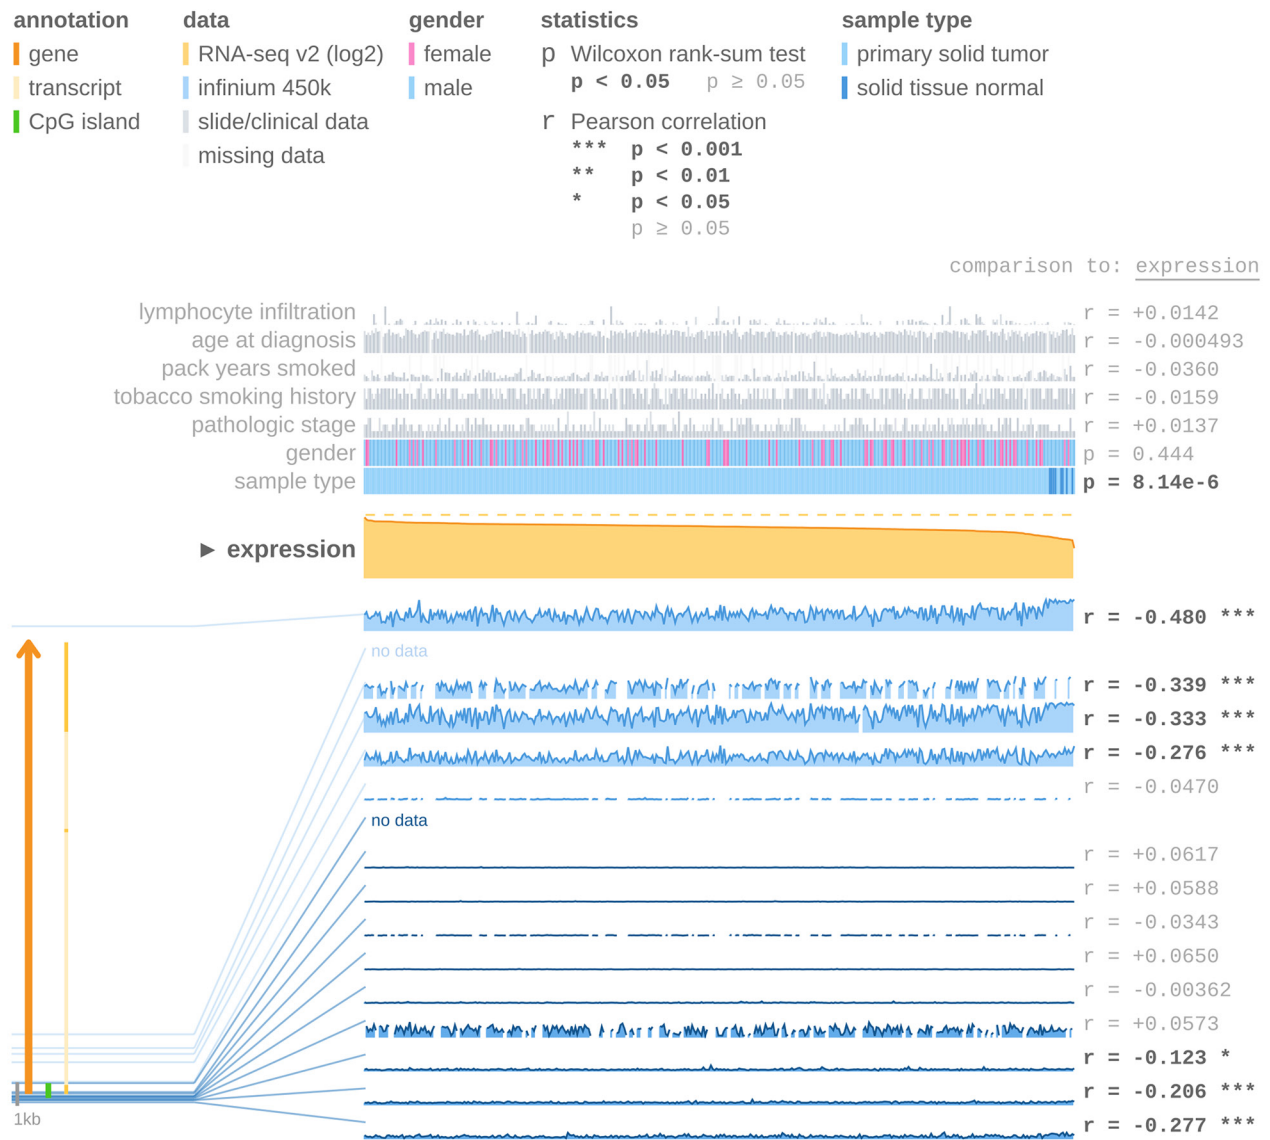

**Supplementary Figure 10: Methylation analysis of *Perp* gene in Lung squamous cell carcinoma.** The highlighted probes are promoter gene region.

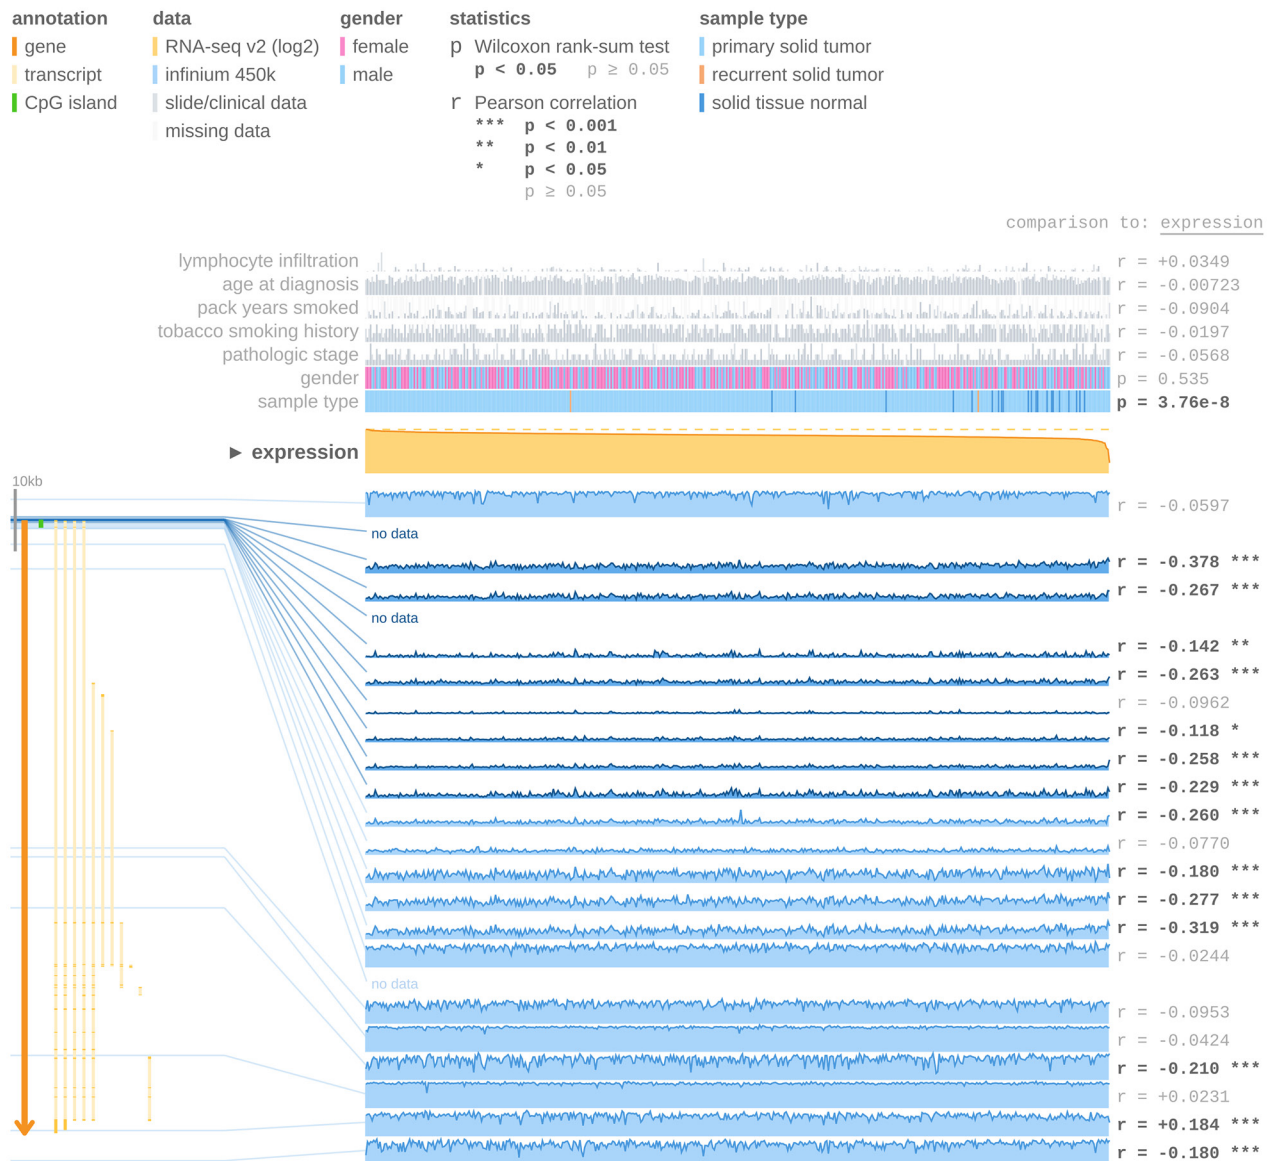

**Supplementary Figure 11: Methylation analysis of *Cdh1* gene in lung adenocarcinoma.** The highlighted probes are promoter gene region.



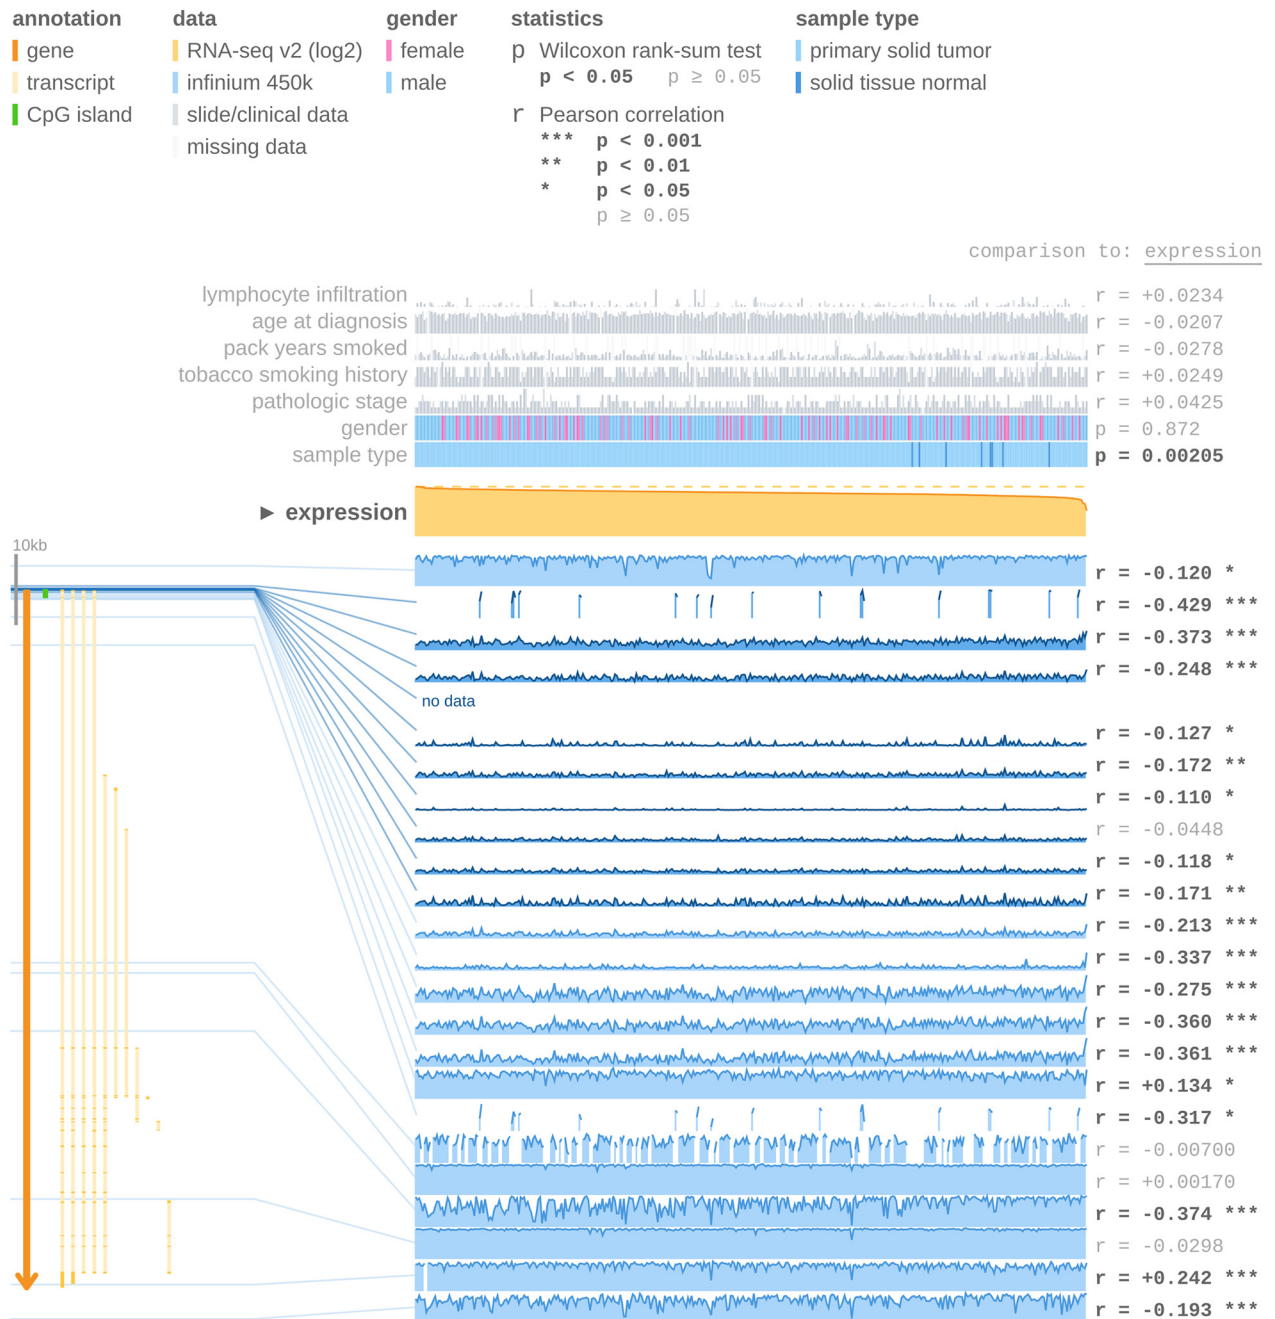

**Supplementary Figure 12: Methylation analysis of *Cdh1* gene in Lung squamous cell carcinoma.** The highlighted probes are promoter gene region.

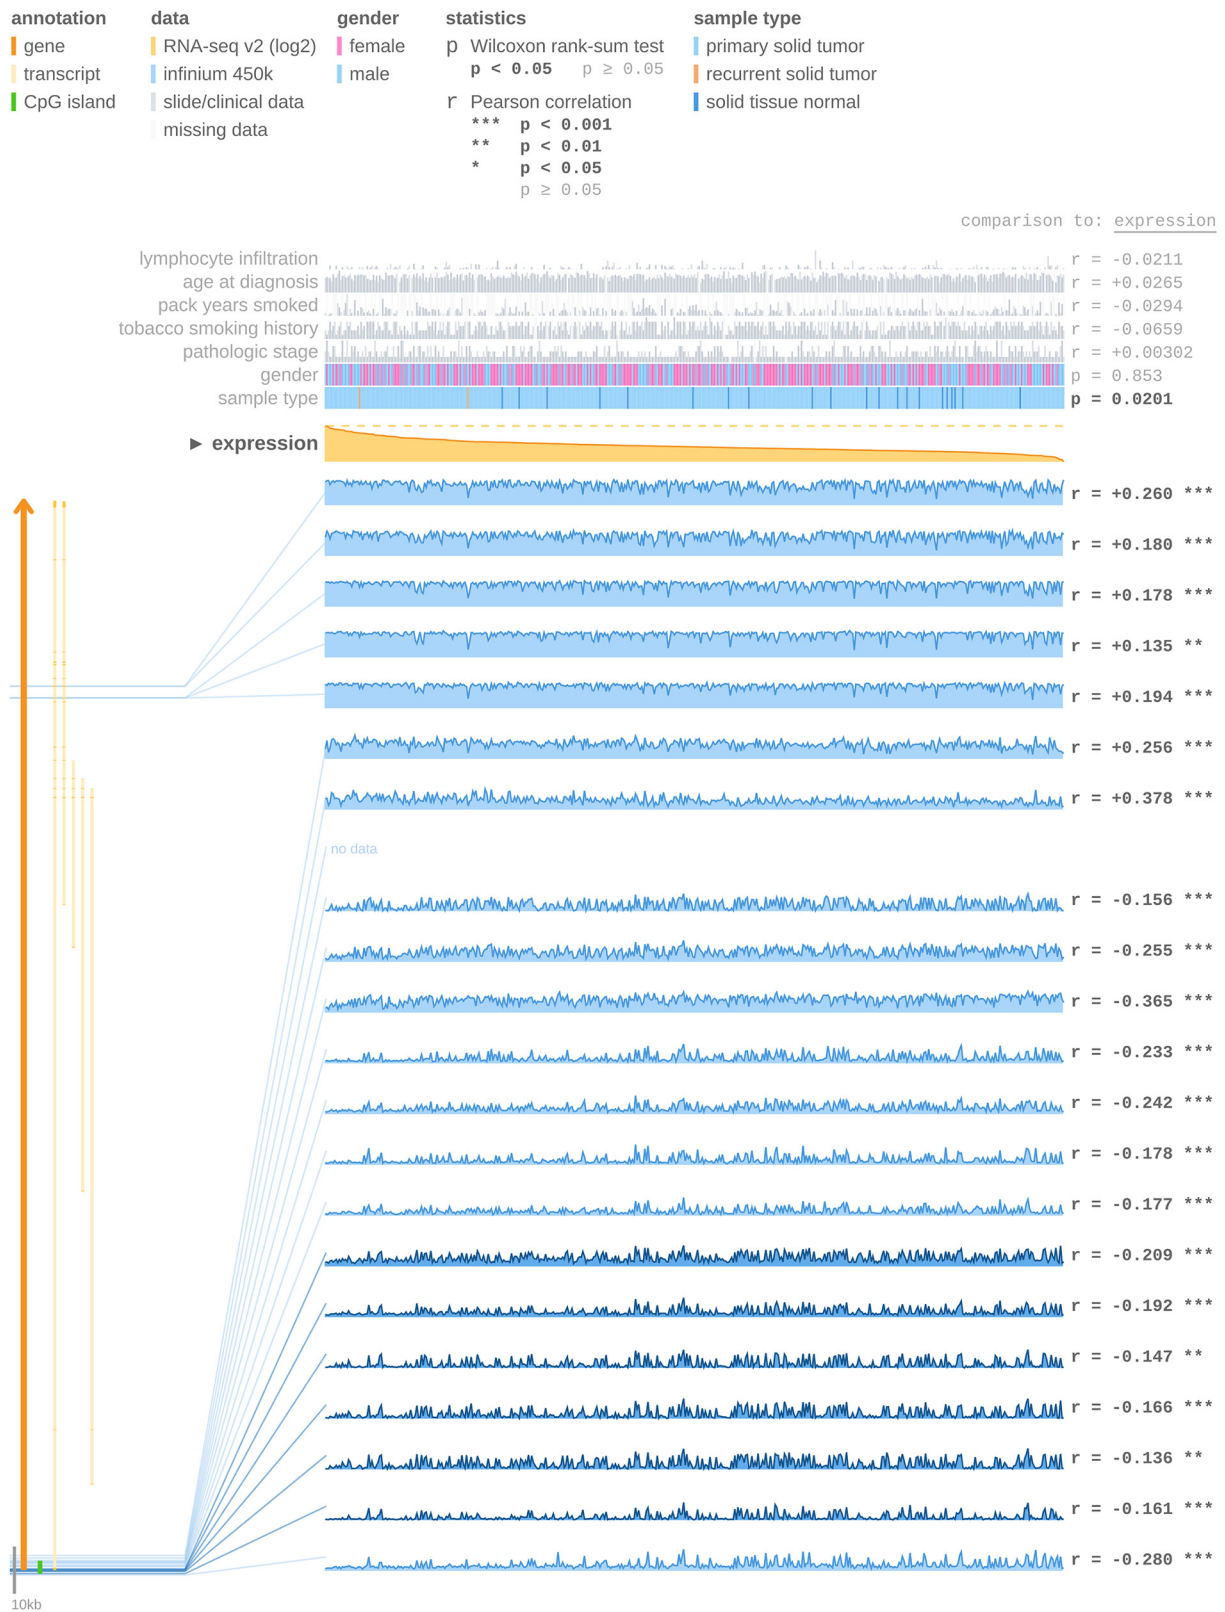

**Supplementary Figure 13: Methylation analysis of *Cdh2* gene in lung adenocarcinoma.** The highlighted probes are promoter gene region.

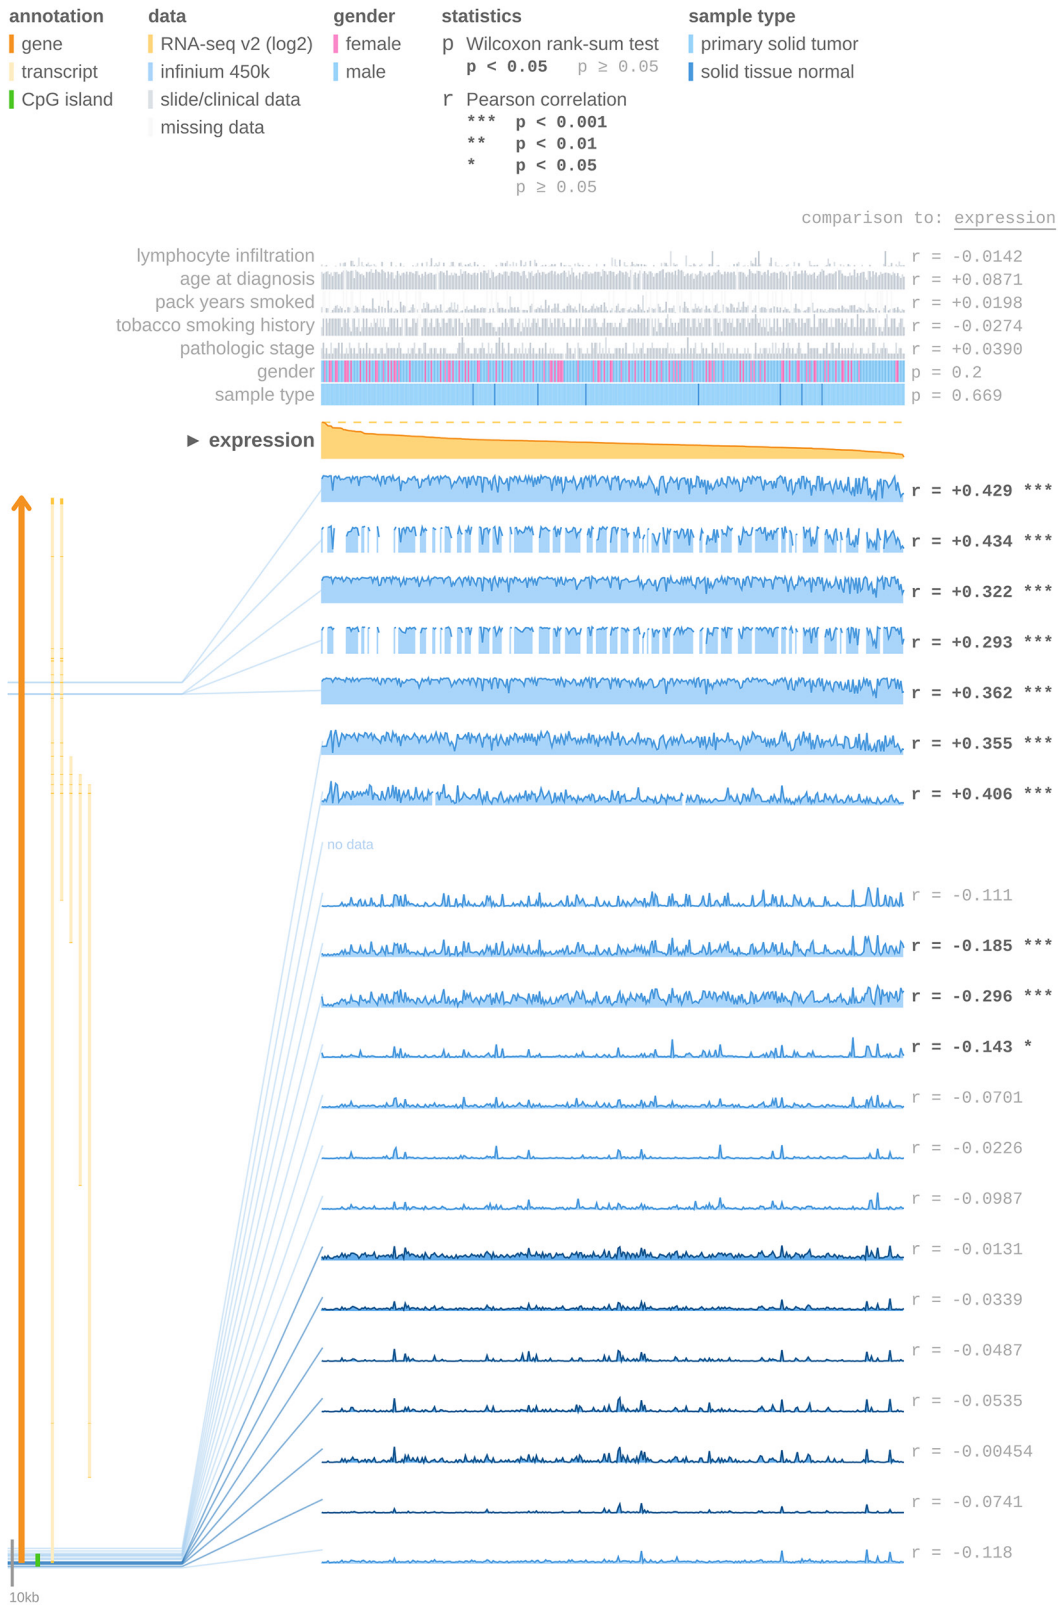

**Supplementary Figure 14: Methylation analysis of *Cdh2* gene in Lung squamous cell carcinoma. The highlighted probes are promoter gene region.**

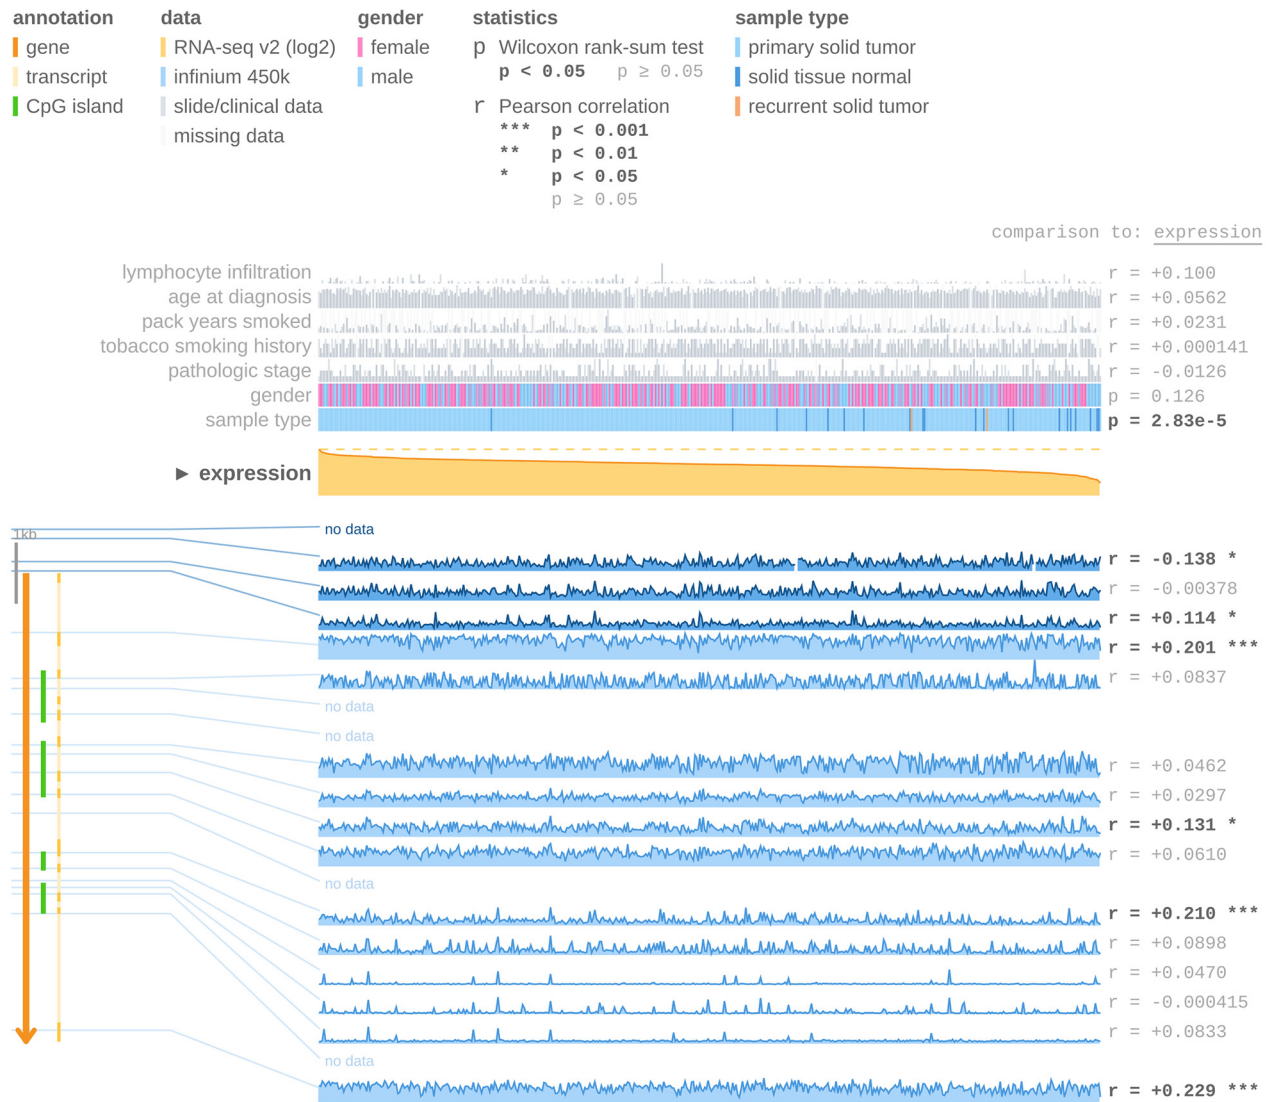

**Supplementary Figure 15: Methylation analysis of *Mmp9* gene in lung adenocarcinoma.** The highlighted probes are promoter gene region.

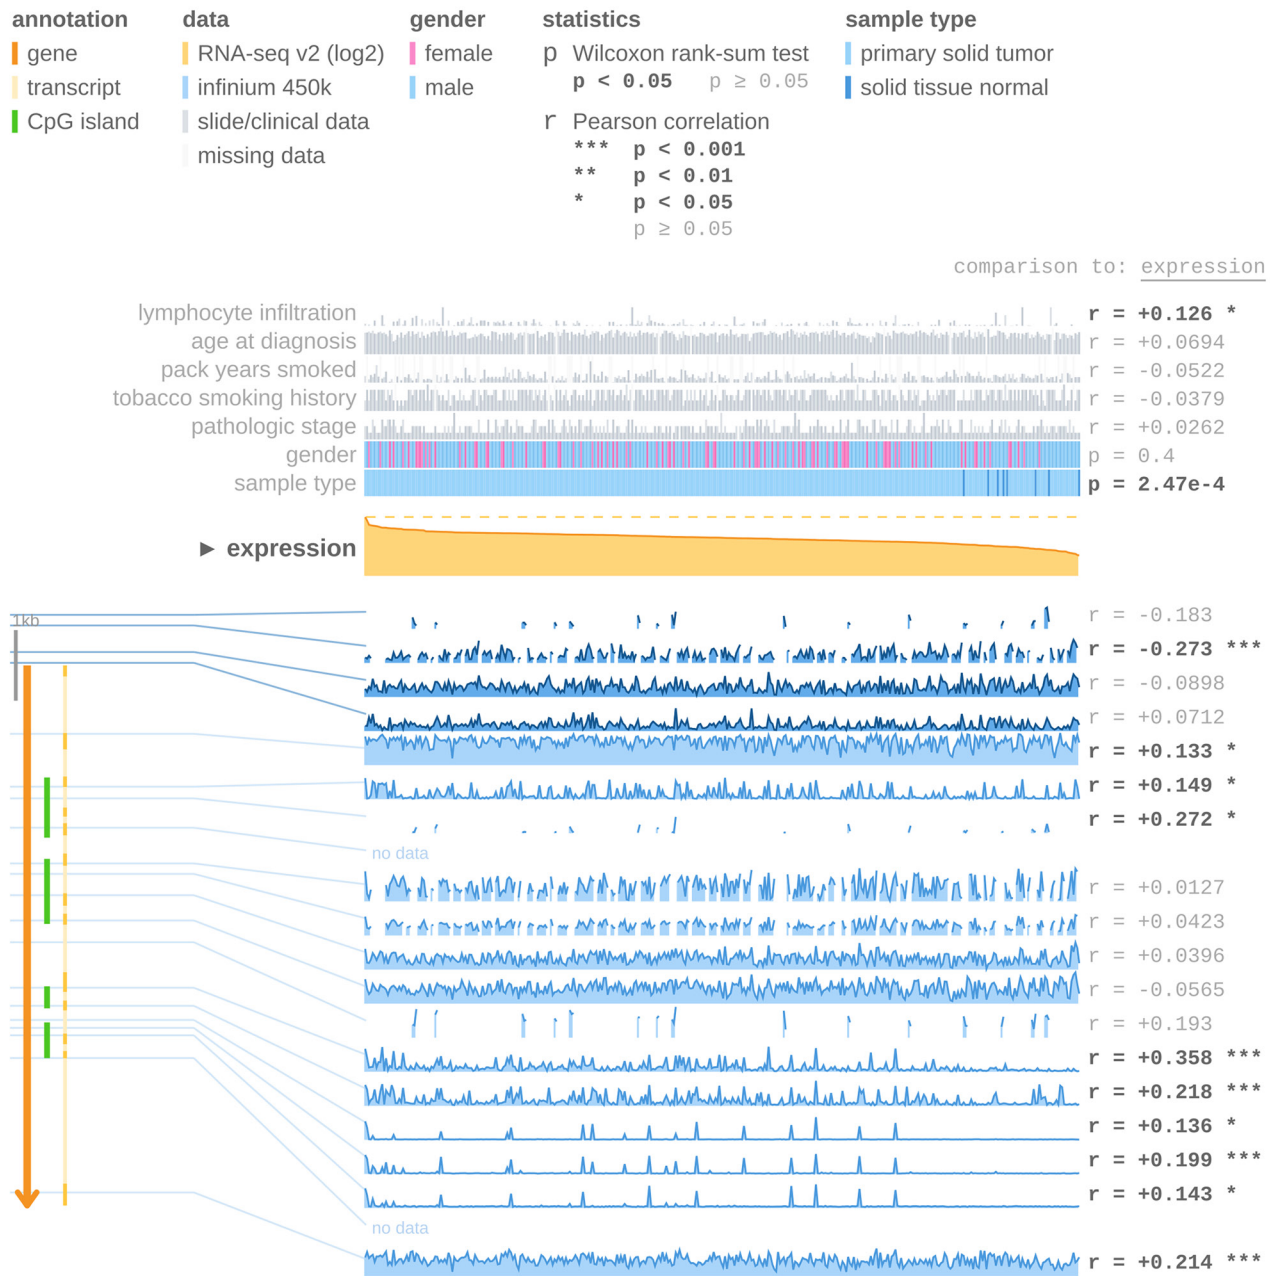

**Supplementary Figure 16: Methylation analysis of *Mmp9* gene in Lung squamous cell carcinoma.** The highlighted probes are promoter gene region.

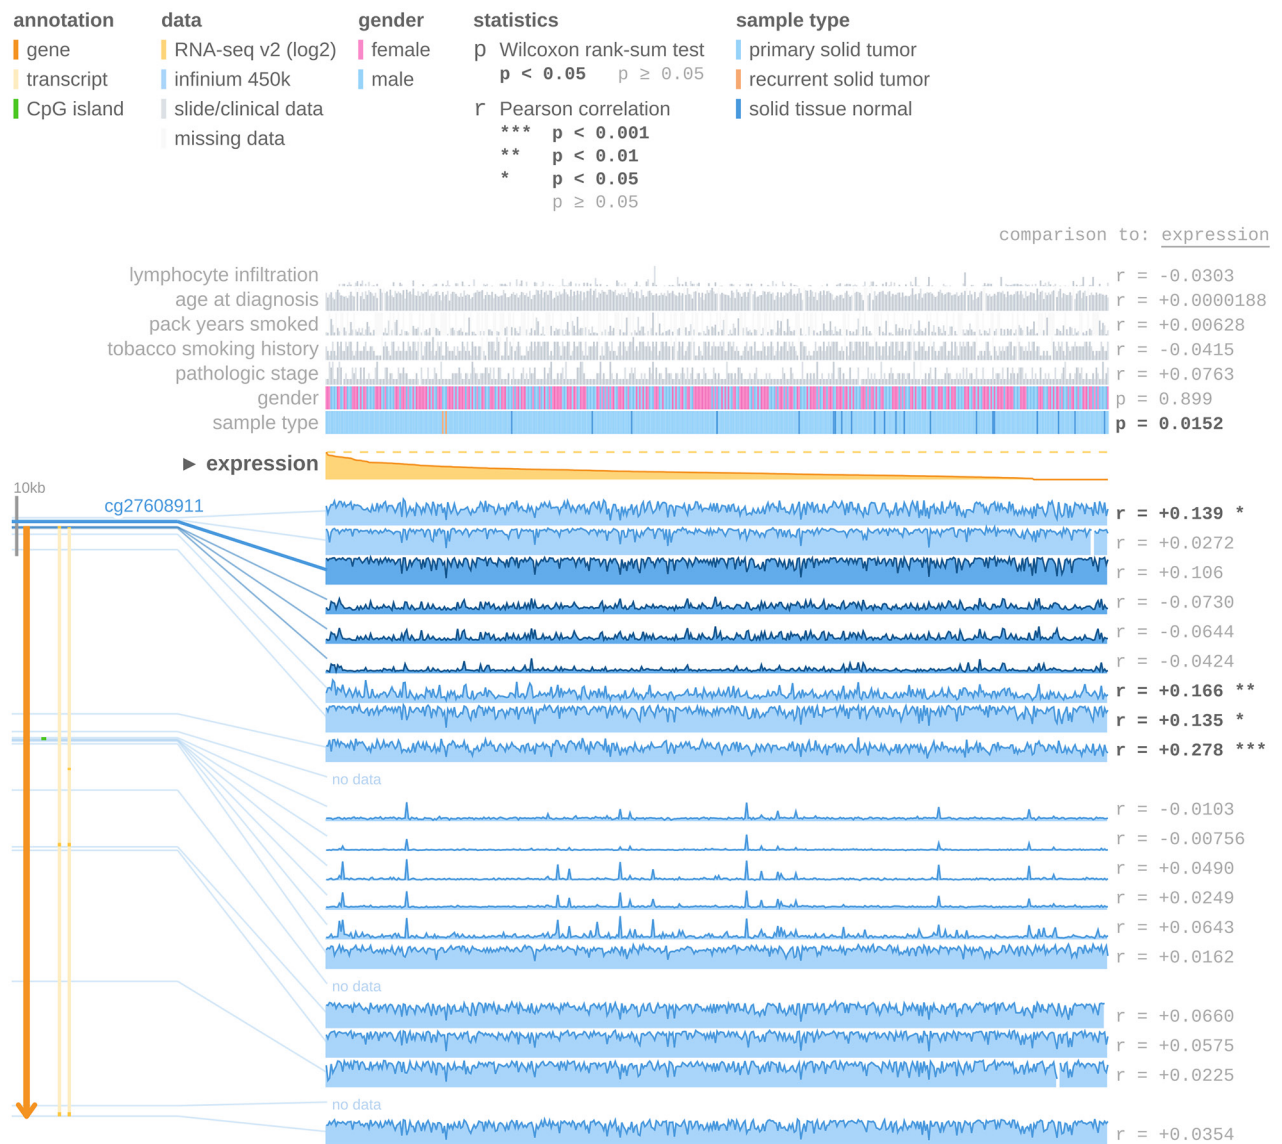

**Supplementary Figure 17: Methylation analysis of *Gap3* gene in lung adenocarcinoma.** The highlighted probes are promoter gene region.

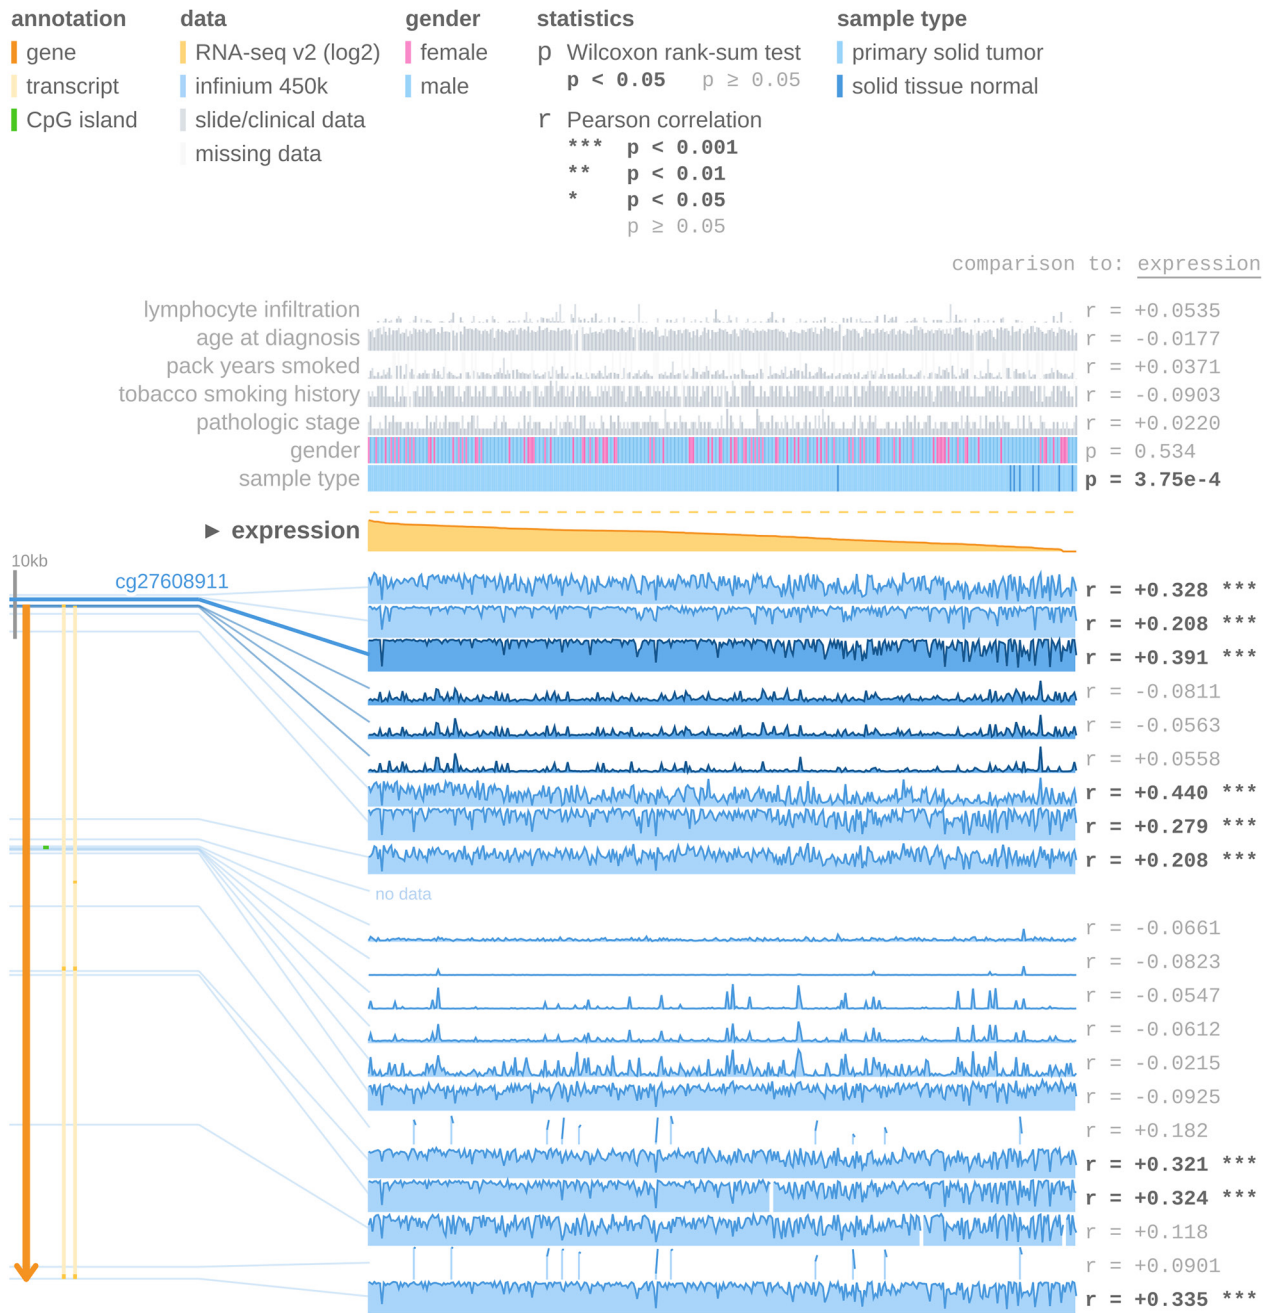

**Supplementary Figure 18: Methylation analysis of *Gap3* gene in Lung squamous cell carcinoma.** The highlighted probes are promoter gene region.

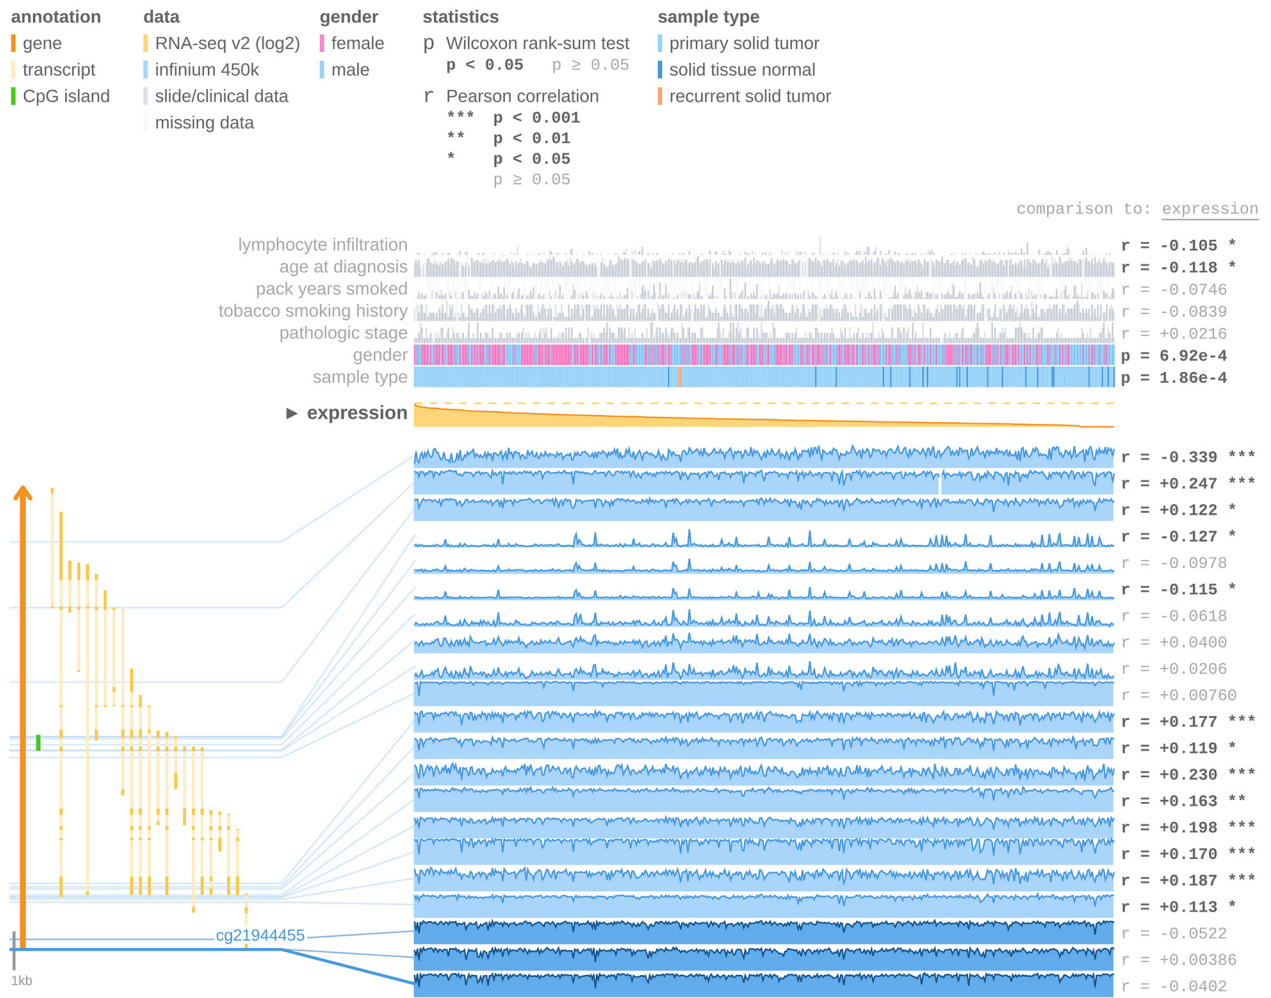

**Supplementary Figure 19: Methylation analysis of *Gfap* gene in lung adenocarcinoma.** The highlighted probes are promoter gene region.



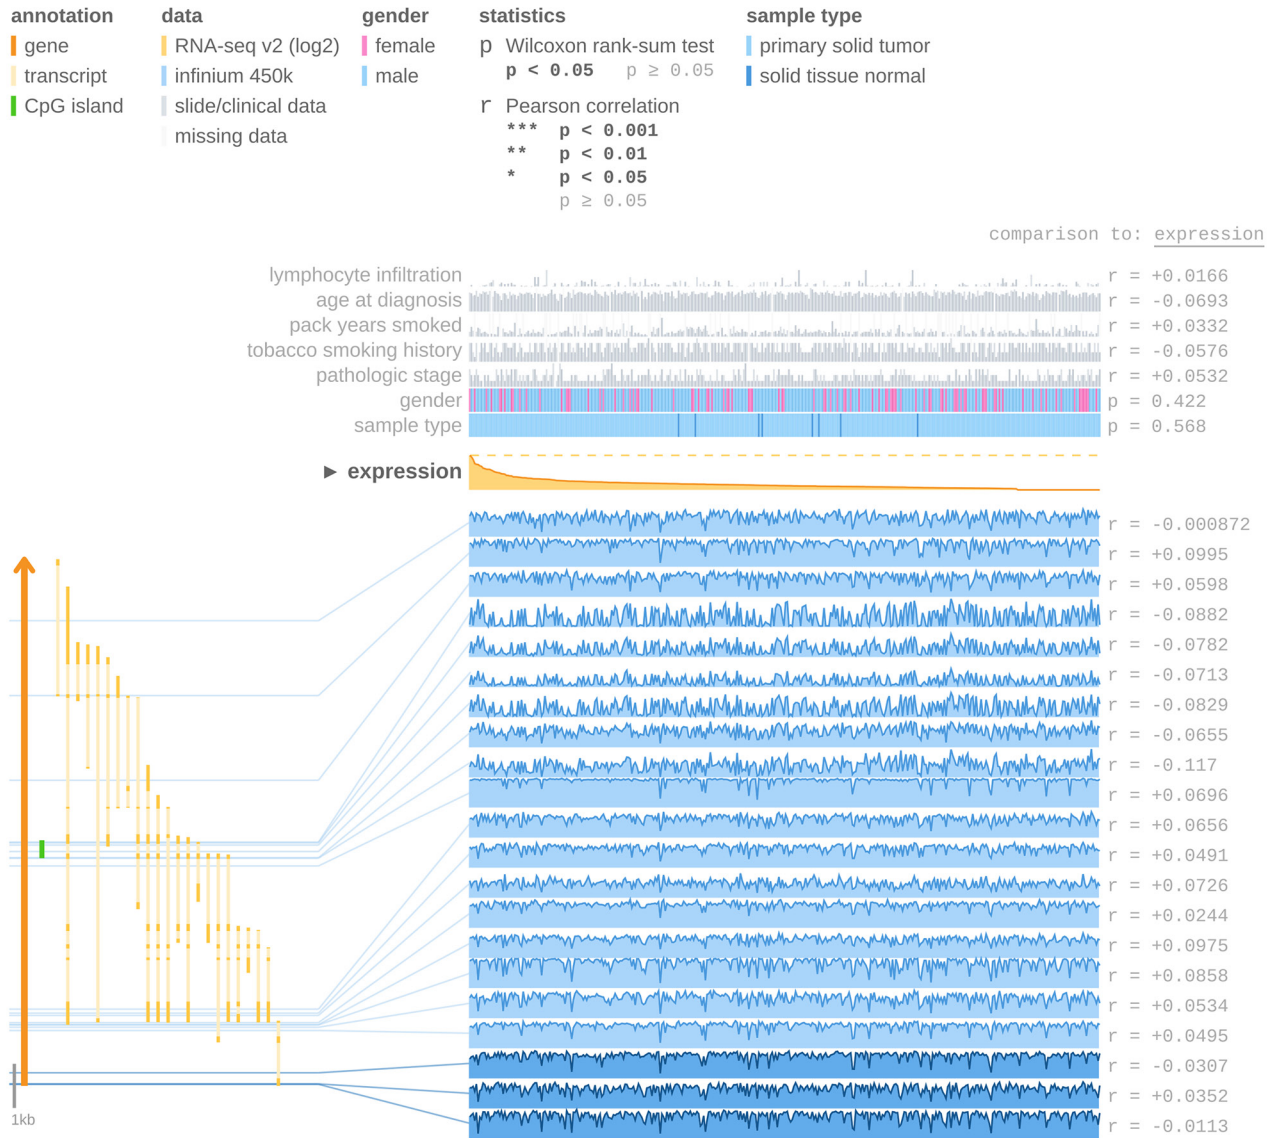

**Supplementary Figure 20: Methylation analysis of *Gfap* gene in Lung squamous cell carcinoma.** The highlighted probes are promoter gene region.

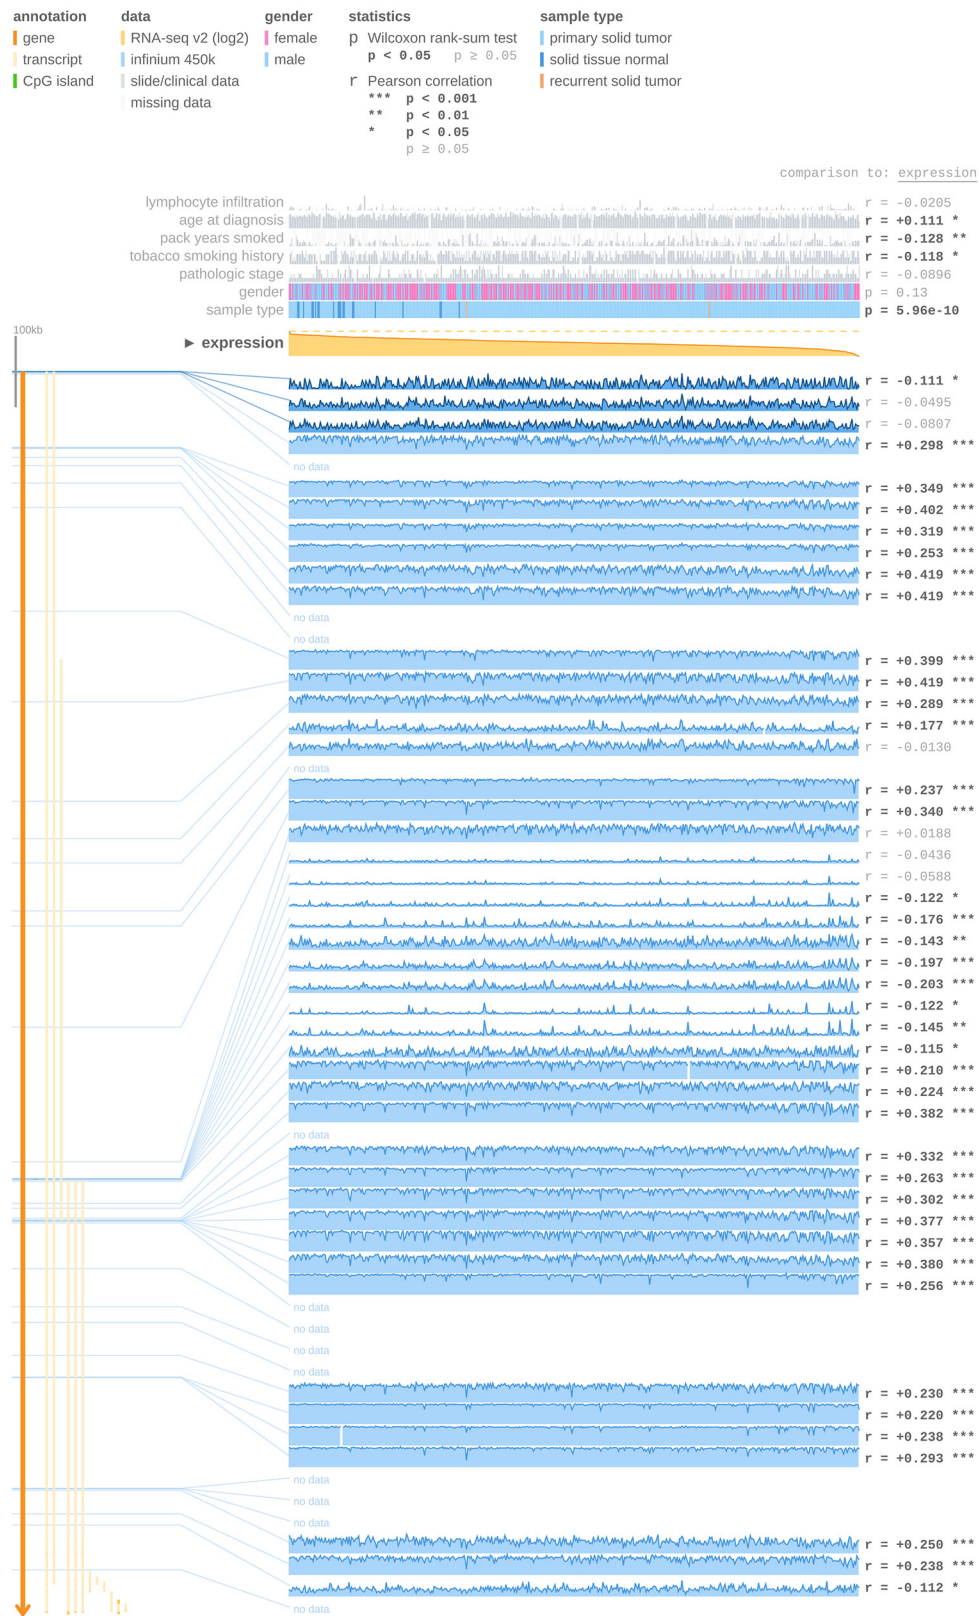

**Supplementary Figure 21: Methylation analysis of *Robo2* gene in lung adenocarcinoma.** The highlighted probes are promoter gene region.

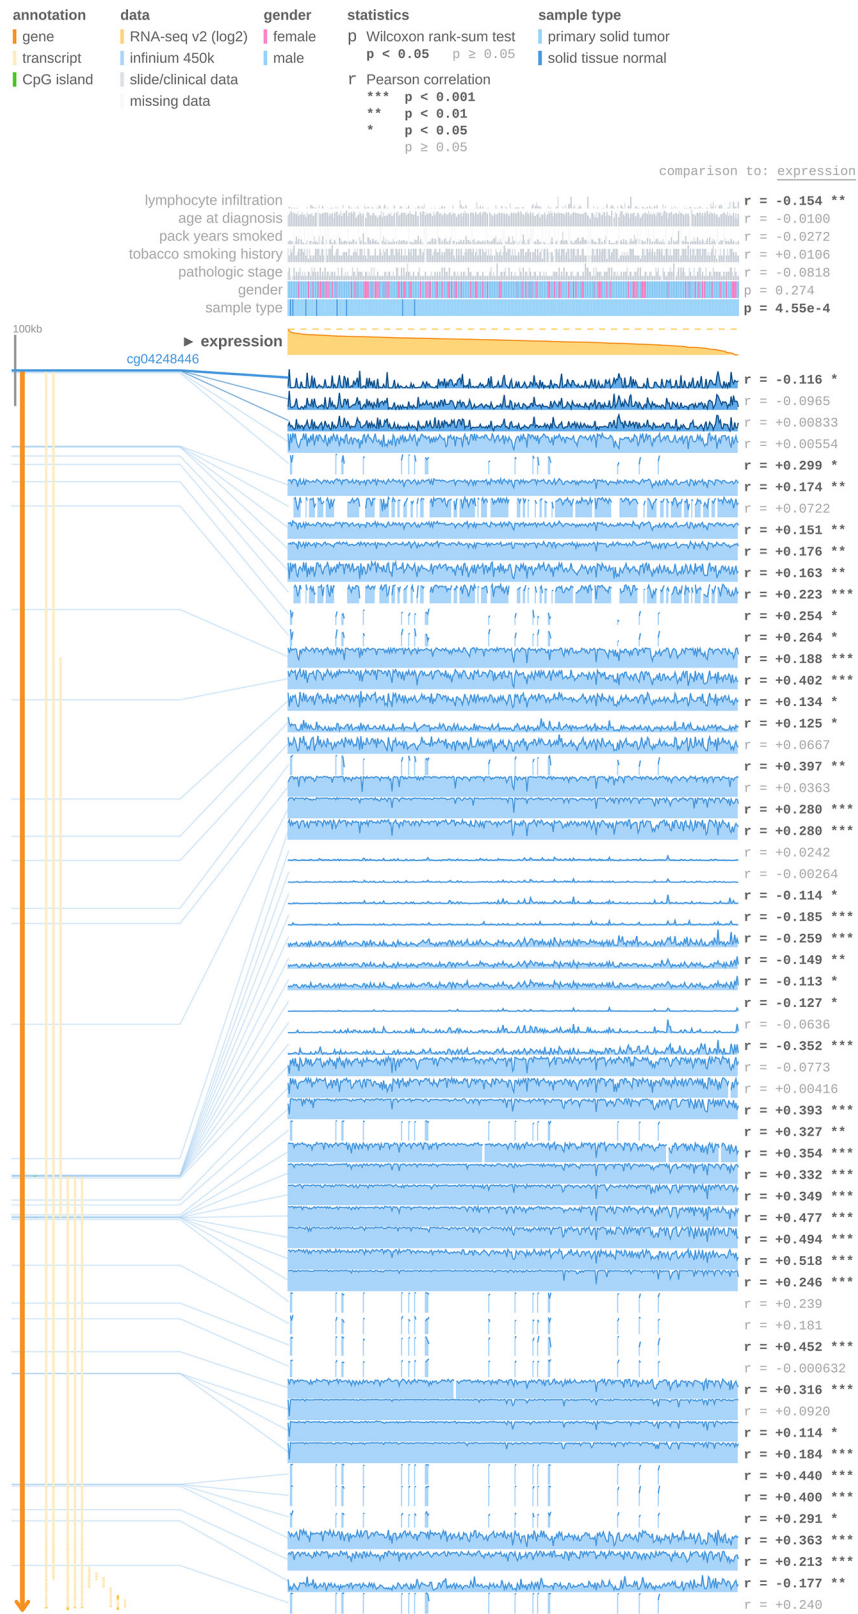

**Supplementary Figure 22: Methylation analysis of *Robo2* gene in Lung squamous cell carcinoma.** The highlighted probes are promoter gene region.

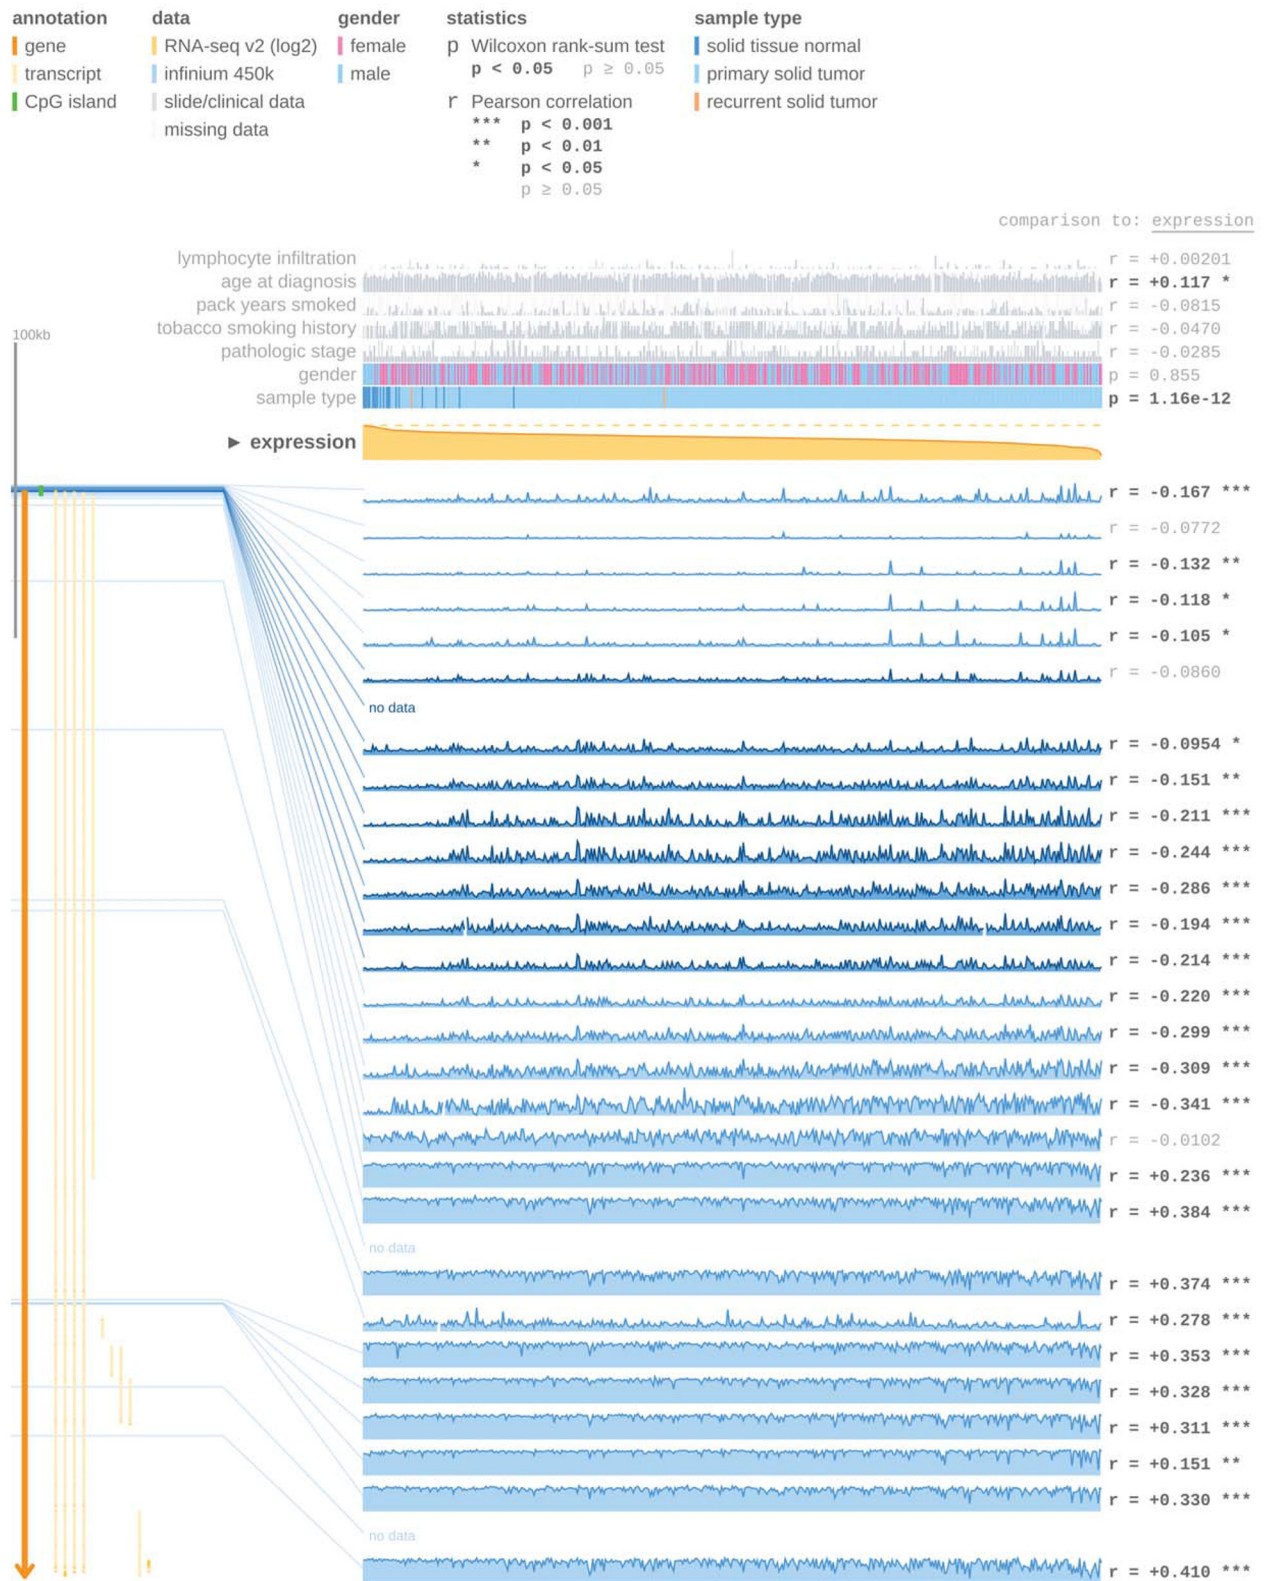

**Supplementary Figure 23: Methylation analysis of *Slit2* gene in lung adenocarcinoma.** The highlighted probes are promoter gene region.

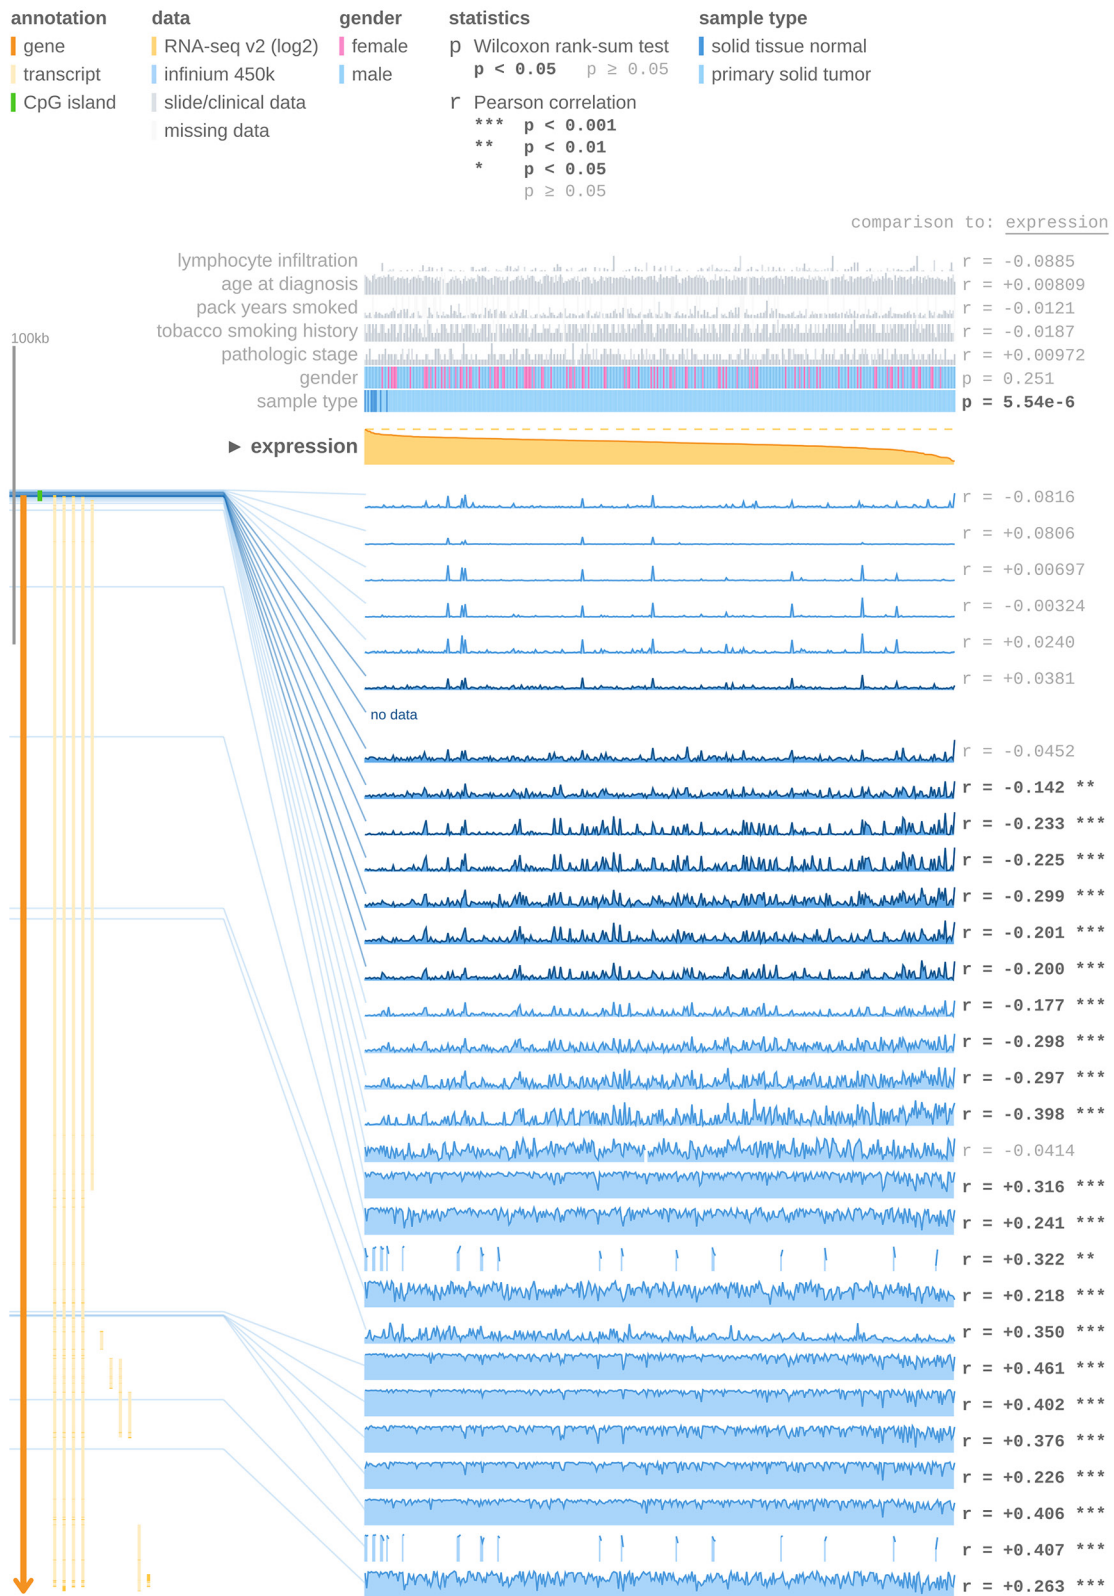

**Supplementary Figure 24: Methylation analysis of *Slit2* gene in Lung squamous cell carcinoma.** The highlighted probes are promoter gene region.

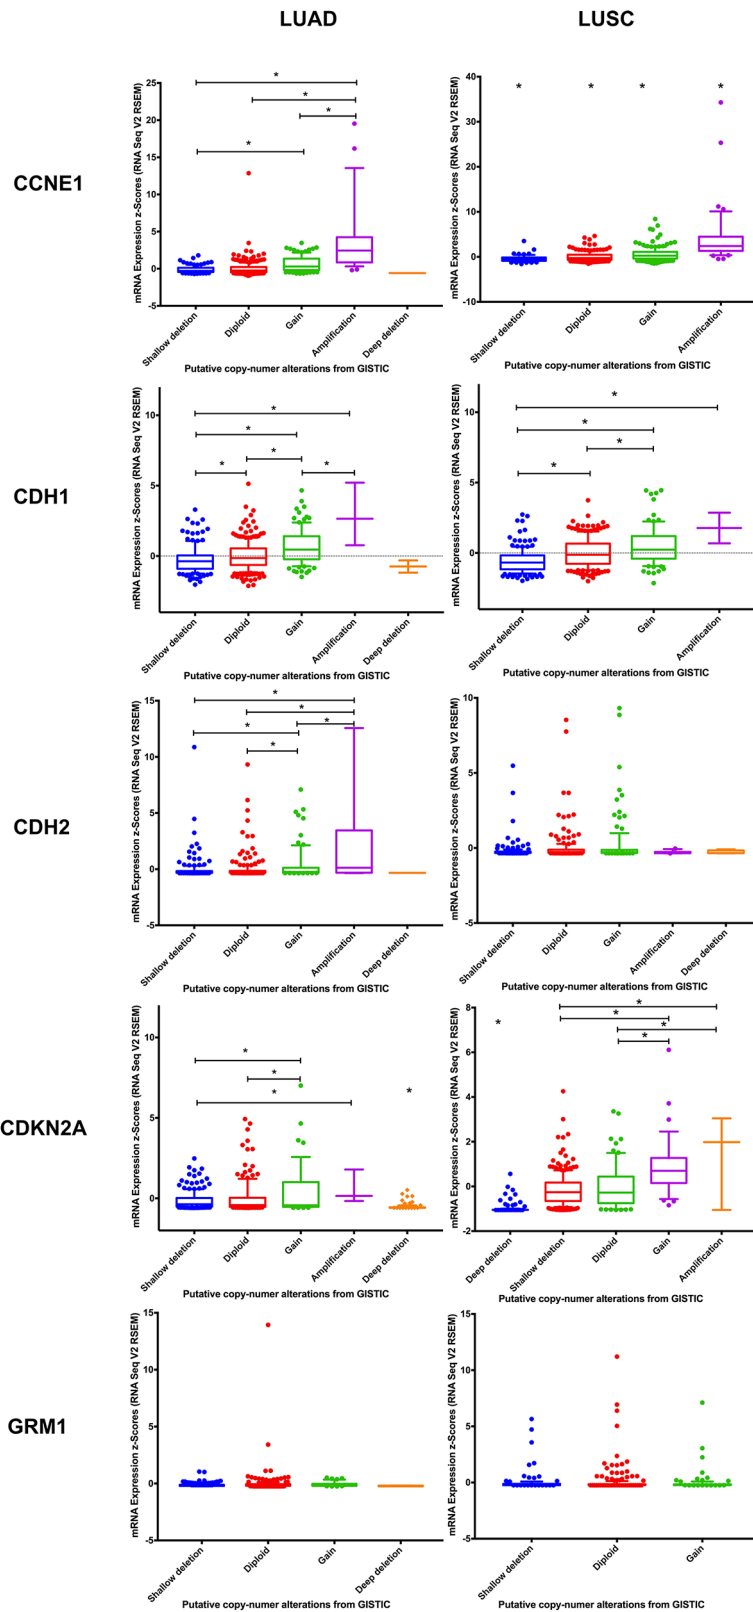

Supplementary Figure 25: Copy number alteration and mRNA expression analysis in lung adenocarcinoma and lung squamous cell carcinoma.

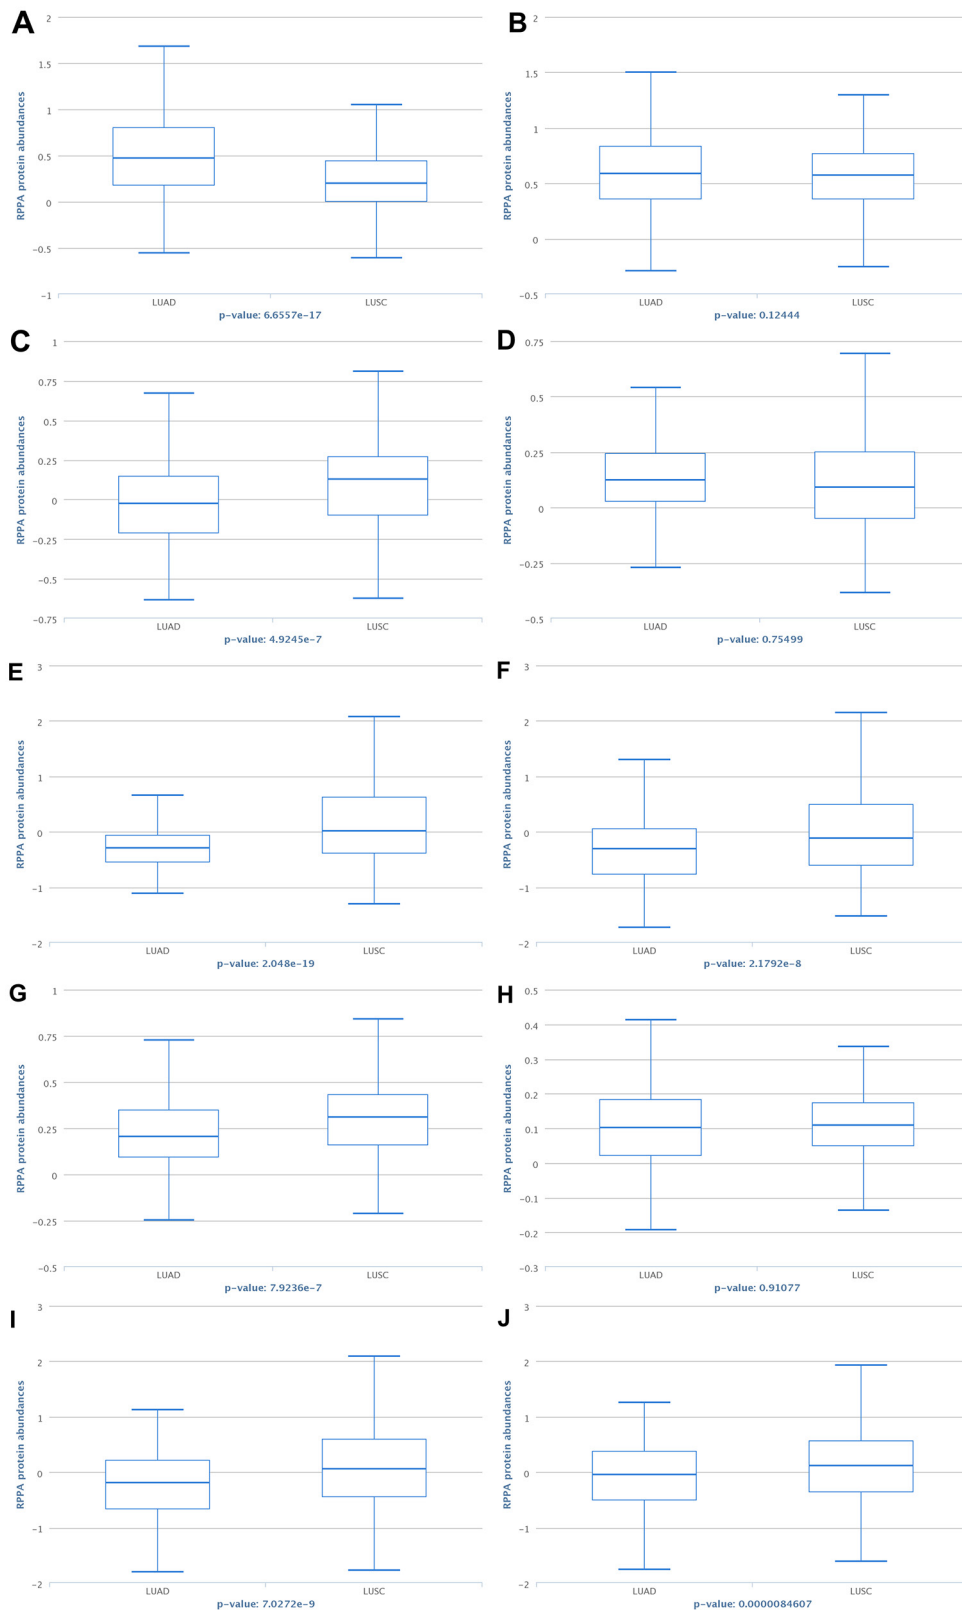

**Supplementary Figure 26:** RPPA analysis of MEK1 (A), MEK1\_pS217S221 (B), Erk2 (C), PRAS40\_pT246 (D), AKT\_pT308 (E), AKT\_pS473 (F), CRAF (G), CRAF\_pS338 (H), GSK3\_pS9 (I), GSK3ALPHABETA\_pS21S9 (J) proteins in lung adenocarcinoma and lung squamous cell carcinoma.

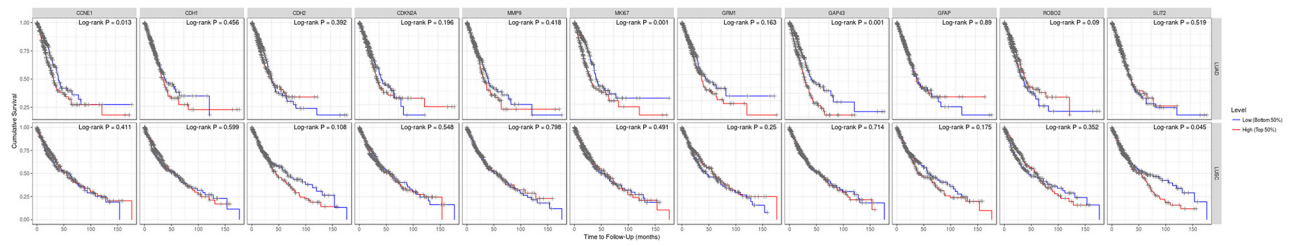

**Supplementary Figure 27: TIMER Survival analyses in lung adenocarcinoma (LUAD) and lung squamous cell carcinoma (LUSC).** Upregulation of *Ccne1*, *Mki67* and *Gap43* downregulation of *Robo2* are associated with poor survival in LUAD. Upregulation of *Slit2* is associated with poor survival in LUSC.
